# Supplementary material for: Effect of tranexamic acid on thrombotic events and seizures in bleeding patients: a systematic review and meta-analysis
Source: Springer Nature journal article supplement (doi:10.1186/s13054-021-03799-9), 2021-11-01

## Online Supplementary Figure

### Table of Contents

|                                                                                                 |    |
|-------------------------------------------------------------------------------------------------|----|
| Figure S1. Risk of bias item presented as percentages.....                                      | 2  |
| Figure S2. Risk of bias summary and graph.....                                                  | 3  |
| Figure S3. Funnel plot of the thrombotic events.....                                            | 5  |
| Figure S4. Funnel plot of the seizures.....                                                     | 6  |
| Figure S5. Forest plot of the thrombotic events: subgroup analysis by underlying disease.....   | 7  |
| Figure S6. Forest plot of the thrombotic events: subgroup analysis by TXA dose.....             | 11 |
| Figure S7. Forest plot of the thrombotic events: subgroup analysis in children. ....            | 14 |
| Figure S8. Forest plot of the seizures: subgroup analysis by underlying disease .....           | 15 |
| Figure S9. Forest plot of the seizures: subgroup analysis by TXA dose .....                     | 17 |
| Figure S10. Forest plot of the seizures: subgroup analysis in children .....                    | 18 |
| Figure S11. Forest plot of the venous thromboembolism: subgroup analysis by underlying disease  | 19 |
| Figure S12. Forest plot of the acute coronary syndrome: subgroup analysis by underlying disease | 23 |
| Figure S13. Forest plot of the stroke: subgroup analysis by underlying disease severity.....    | 25 |

**Figure S1.** Risk of bias item presented as percentages across all included studies.

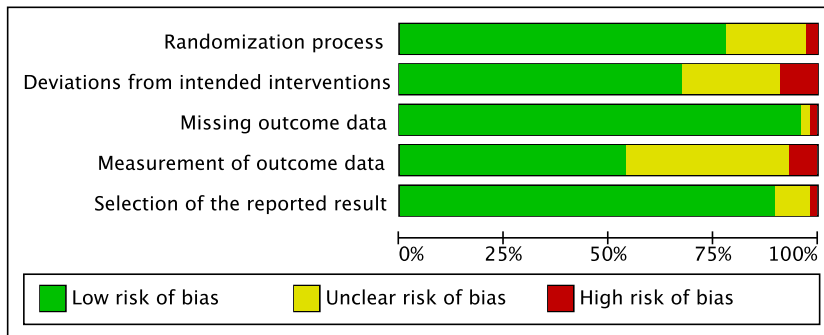

Figure S2. Risk of bias summary and graph.

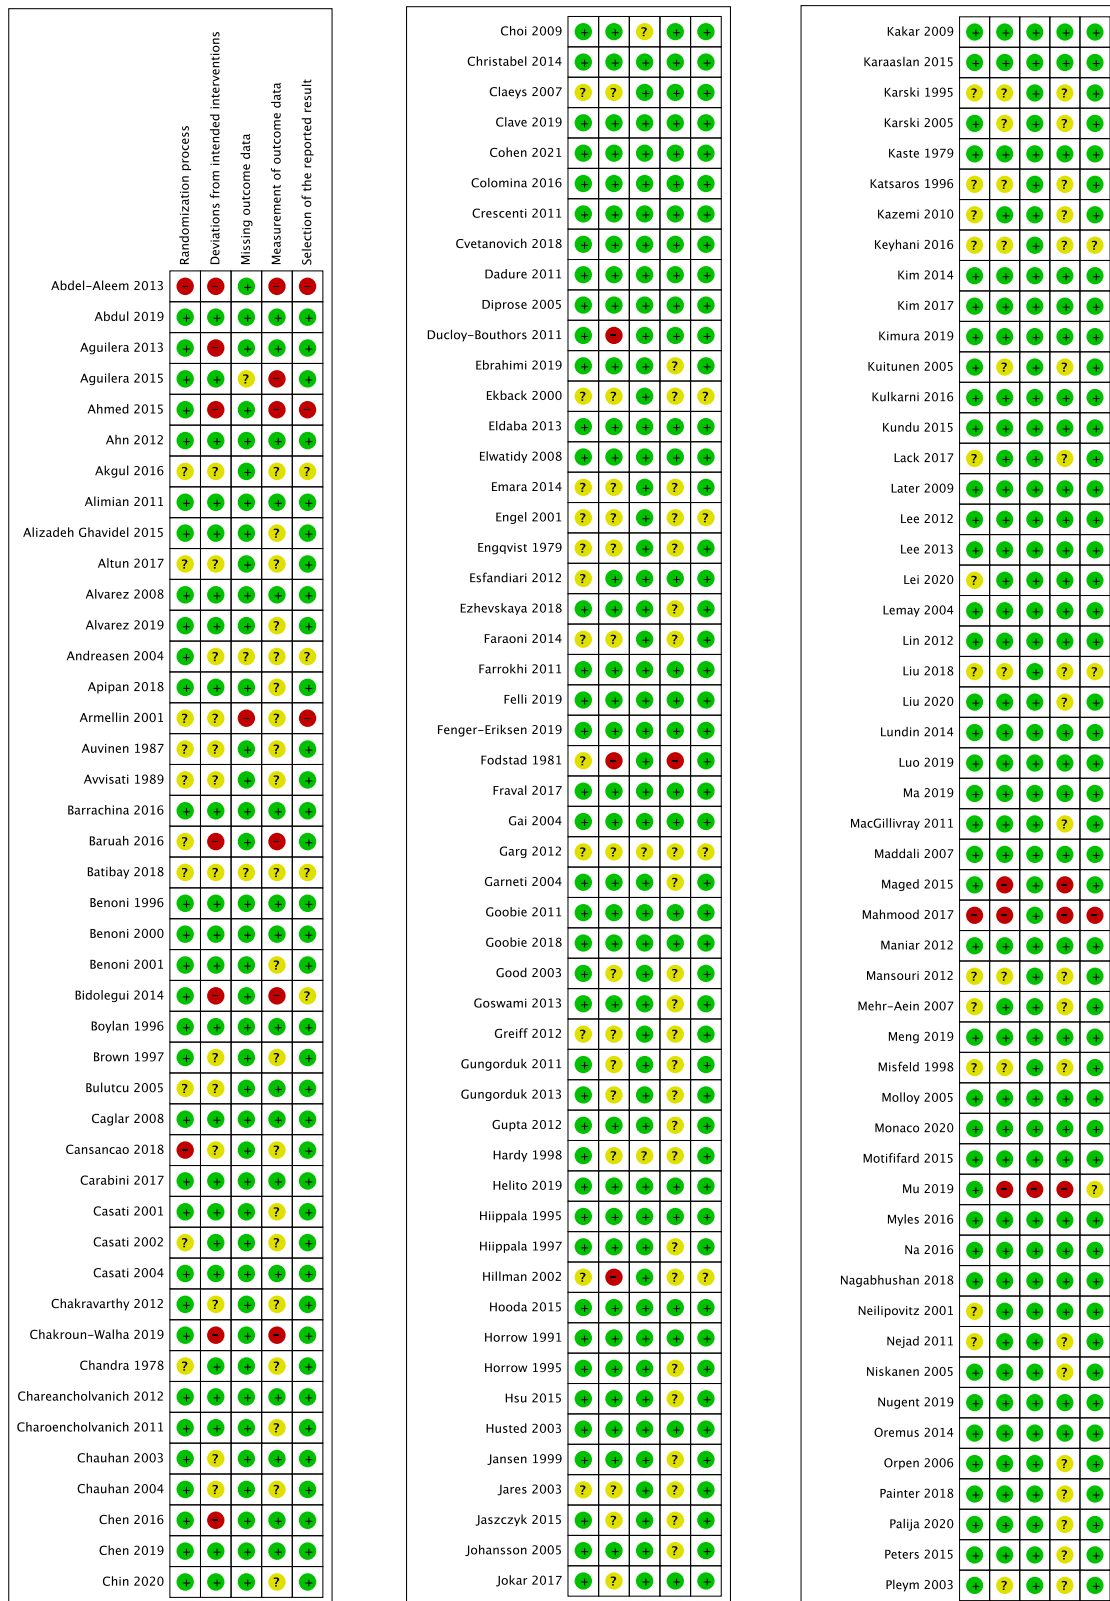

|                      |   |   |   |   |   |
|----------------------|---|---|---|---|---|
| Prakash 2017         | ● | ● | ● | ● | ● |
| Prasad 2018          | ● | ● | ● | ● | ● |
| Raksakietisak 2015   | ● | ● | ● | ● | ● |
| Ramezani 2005        | ? | ● | ● | ● | ● |
| Ray 2016             | ● | ? | ● | ? | ● |
| Reid 1997            | ● | ● | ● | ● | ● |
| Roberts 2019         | ● | ● | ● | ● | ● |
| Roberts 2020         | ● | ● | ● | ● | ● |
| Ross 2000            | ● | ● | ● | ● | ● |
| Rowell 2020          | ● | ● | ● | ● | ● |
| Sahu 2019            | ● | ● | ● | ● | ● |
| Sallam 2019          | ● | ● | ● | ● | ● |
| Sankar 2012          | ● | ● | ● | ● | ● |
| Santos 2006          | ● | ● | ● | ? | ● |
| Seddighi 2019        | ? | ? | ? | ? | ● |
| Sentilhes 2018       | ● | ● | ● | ● | ● |
| Senturk 2013         | ● | ● | ● | ? | ? |
| Seo 2013             | ● | ? | ● | ? | ● |
| Seol 2016            | ● | ? | ● | ? | ● |
| Sevcicu 2016         | ● | ● | ● | ? | ● |
| Shaaban 2016         | ● | ● | ● | ? | ? |
| Shahid 2013          | ● | ● | ● | ● | ● |
| Shakur 2010          | ● | ● | ● | ● | ● |
| Shakur 2017          | ● | ● | ● | ● | ● |
| Shen 2015            | ● | ● | ● | ● | ● |
| Shi, J 2013          | ● | ● | ● | ● | ● |
| Shi 2013             | ● | ● | ● | ● | ● |
| Shi 2017             | ● | ● | ● | ● | ● |
| Shimizu 2011         | ● | ● | ● | ● | ● |
| Shore-Lesserson 1996 | ● | ? | ● | ? | ● |
| Spitler 2019         | ● | ? | ● | ? | ● |
| Sprigg 2014          | ● | ? | ● | ? | ● |
| Sprigg 2018          | ● | ● | ● | ● | ● |
| Stowers 2017         | ● | ● | ● | ● | ● |
| Sun 2017             | ● | ? | ● | ? | ● |
| Taghaddomi 2009      | ● | ● | ● | ● | ● |
| Tengberg 2016        | ● | ● | ● | ● | ● |
| Thipparampall 2020   | ● | ● | ● | ● | ● |
| Tian 2018            | ● | ? | ● | ? | ● |
| Topsoee 2016         | ● | ● | ● | ● | ● |
| Tsementzis 1990      | ? | ● | ● | ? | ● |
| Tsutsumimoto 2011    | ● | ● | ● | ● | ● |
| Vanek 2005           | ● | ● | ● | ? | ● |
| Vara 2017            | ? | ● | ● | ● | ● |
| Veien 2002           | ● | ● | ● | ? | ● |
| Vel 2015             | ● | ● | ● | ● | ● |
| Vela 2012            | ? | ? | ? | ? | ? |
| Verma 2014           | ● | ● | ● | ● | ● |
| Vermeulen 1984       | ● | ● | ● | ● | ● |
| Vijay 2013           | ? | ● | ● | ? | ● |
| Volquind 2014        | ● | ● | ● | ● | ● |
| von Holstein 1987    | ● | ● | ● | ● | ● |
| Wang, J 2016         | ● | ● | ● | ● | ● |
| Wang 2012            | ● | ● | ● | ● | ● |
| Wang 2013            | ● | ? | ● | ? | ● |
| Wang 2016            | ● | ● | ● | ● | ● |

|                      |   |   |   |   |   |
|----------------------|---|---|---|---|---|
| Wang 2018            | ● | ● | ● | ● | ● |
| Watts 2017           | ● | ● | ● | ● | ● |
| Wei 2006             | ? | ? | ● | ? | ● |
| Wong 2008            | ● | ● | ● | ● | ● |
| Wu 2006              | ● | ● | ● | ? | ● |
| Xie 2015             | ● | ● | ● | ● | ● |
| Xu 2012              | ? | ? | ● | ? | ? |
| Xu 2013              | ● | ? | ● | ? | ● |
| Xu 2019              | ● | ● | ● | ● | ● |
| Yamasaki 2004        | ● | ● | ● | ? | ● |
| Yamasaki 2005        | ? | ? | ● | ? | ? |
| Yanartas 2015        | ● | ● | ● | ● | ● |
| Ye 2019              | ? | ? | ● | ? | ? |
| Yen 2017             | ● | ● | ● | ● | ● |
| Yi 2016              | ● | ● | ● | ● | ● |
| Yuan 2017            | ● | ● | ● | ● | ● |
| Yutthakasemsunt 2013 | ● | ● | ● | ● | ● |
| Zabeeda 2002         | ? | ? | ● | ? | ● |
| Zaman 2019           | ● | ● | ● | ? | ● |
| Zekcer 2016          | ● | ● | ● | ? | ? |
| Zhang 2016           | ● | ? | ● | ? | ● |
| Zhang 2018           | ● | ● | ● | ● | ● |
| Zhang 2020           | ● | ● | ● | ● | ● |
| Zhang 2021           | ● | ● | ● | ● | ● |
| Zhang S 2020         | ● | ● | ● | ● | ● |
| Zhao 2018            | ● | ● | ● | ● | ● |
| Zhou 2018            | ● | ● | ● | ● | ● |
| Zhou 2019            | ● | ● | ● | ● | ● |
| Zhu 2020             | ● | ● | ● | ● | ● |
| Zohar 2004           | ● | ● | ● | ? | ? |
| Zufferey 2010        | ● | ● | ● | ● | ● |



**Figure S3.** Funnel plot of the thrombotic events.

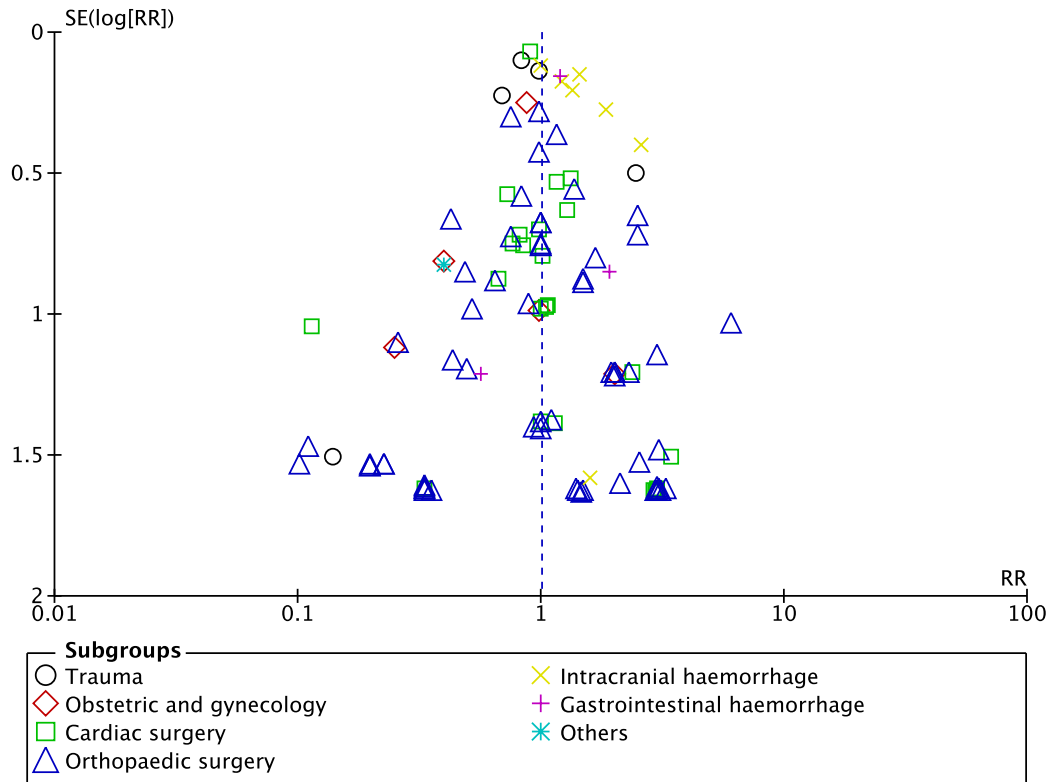

**Figure S4.** Funnel plot of the seizures.

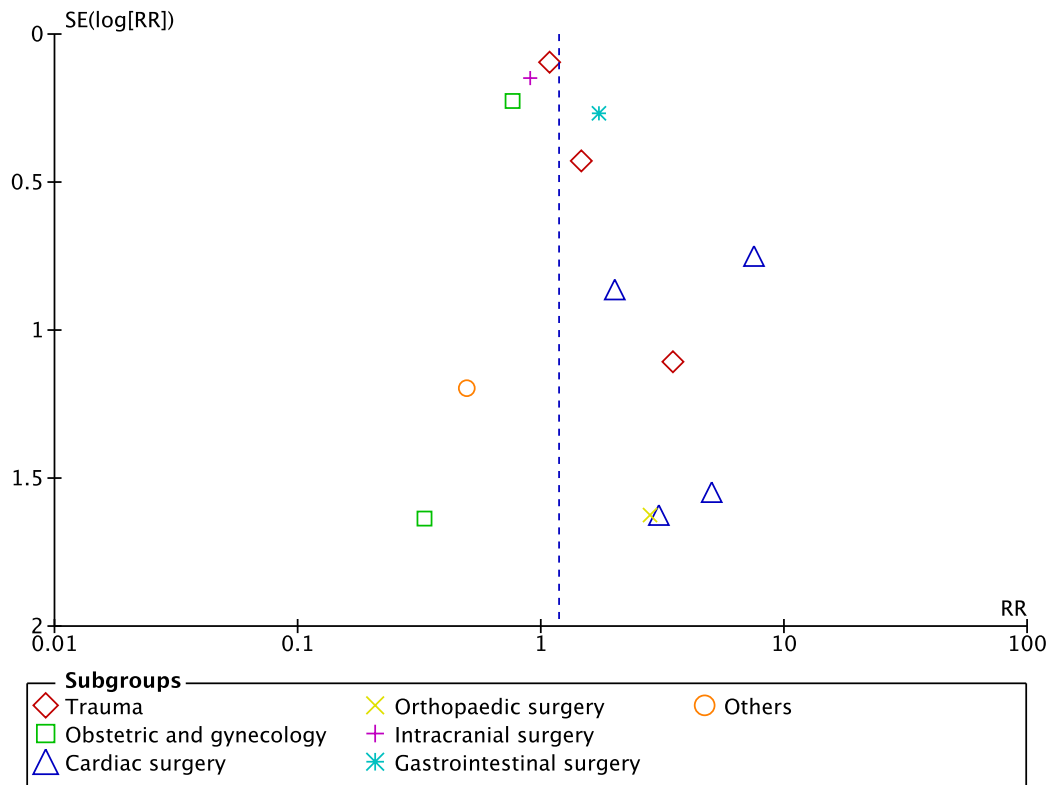

**Figure S5.** Forest plot of the thrombotic events: subgroup analysis by underlying disease.

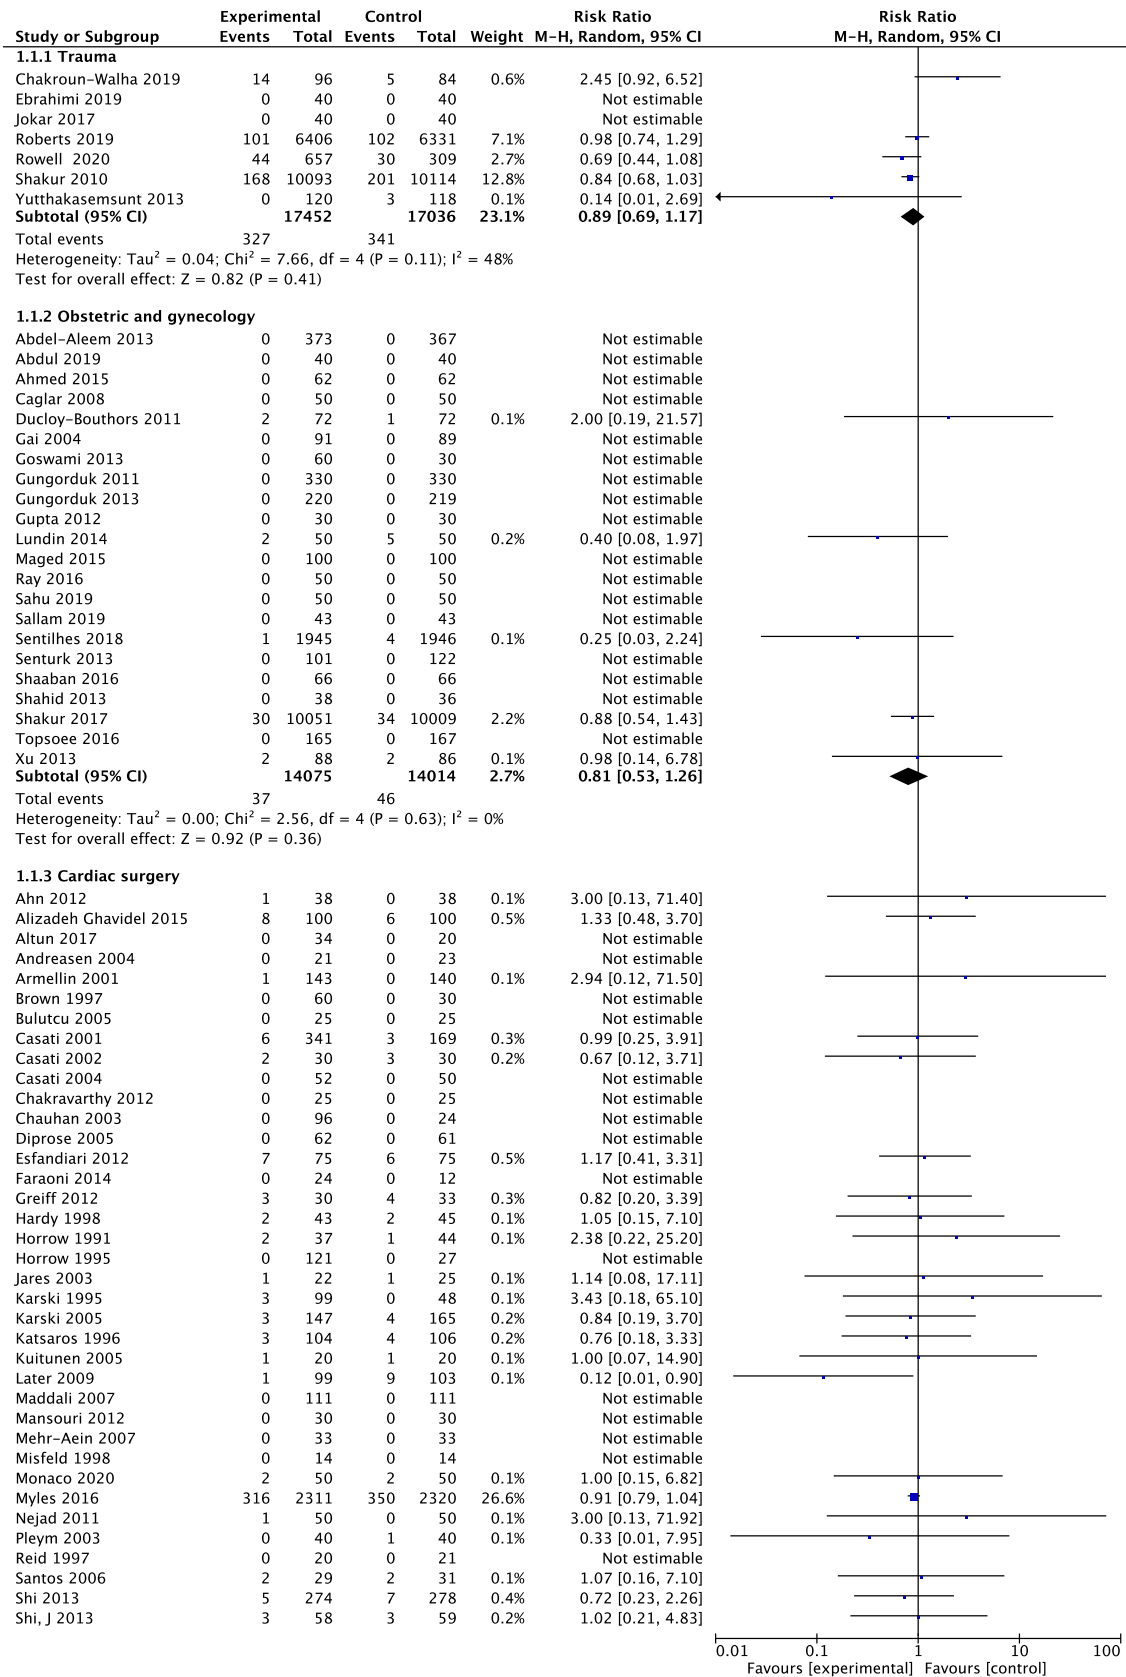

|                          |   |             |   |             |              |                          |
|--------------------------|---|-------------|---|-------------|--------------|--------------------------|
| Shimizu 2011             | 1 | 81          | 0 | 79          | 0.1%         | 2.93 [0.12, 70.79]       |
| Shore-Lesserson 1996     | 5 | 17          | 3 | 13          | 0.3%         | 1.27 [0.37, 4.39]        |
| Taghaddomi 2009          | 0 | 50          | 0 | 50          |              | Not estimable            |
| Vanek 2005               | 0 | 39          | 0 | 20          |              | Not estimable            |
| Wang 2012                | 0 | 116         | 0 | 115         |              | Not estimable            |
| Wei 2006                 | 0 | 36          | 0 | 40          |              | Not estimable            |
| Zabeeda 2002             | 0 | 25          | 0 | 25          |              | Not estimable            |
| Zhang 2018               | 0 | 105         | 0 | 105         |              | Not estimable            |
| <b>Subtotal (95% CI)</b> |   | <b>5337</b> |   | <b>4922</b> | <b>30.9%</b> | <b>0.92 [0.81, 1.05]</b> |

Total events 379 412  
Heterogeneity: Tau<sup>2</sup> = 0.00; Chi<sup>2</sup> = 9.34, df = 23 (P = 0.99); I<sup>2</sup> = 0%  
Test for overall effect: Z = 1.26 (P = 0.21)

#### 1.1.4 Orthopaedic surgery

|                        |    |     |    |     |      |                    |
|------------------------|----|-----|----|-----|------|--------------------|
| Aguilera 2013          | 1  | 41  | 0  | 42  | 0.1% | 3.07 [0.13, 73.29] |
| Aguilera 2015          | 0  | 50  | 0  | 50  |      | Not estimable      |
| Akgul 2016             | 0  | 35  | 1  | 35  | 0.1% | 0.33 [0.01, 7.91]  |
| Alvarez 2008           | 0  | 46  | 0  | 49  |      | Not estimable      |
| Alvarez 2019           | 3  | 22  | 3  | 22  | 0.2% | 1.00 [0.23, 4.42]  |
| Barrachina 2016        | 2  | 71  | 2  | 37  | 0.1% | 0.52 [0.08, 3.55]  |
| Baruah 2016            | 0  | 30  | 0  | 30  |      | Not estimable      |
| Batibay 2018           | 0  | 35  | 0  | 35  |      | Not estimable      |
| Benoni 1996            | 4  | 43  | 4  | 43  | 0.3% | 1.00 [0.27, 3.74]  |
| Benoni 2000            | 3  | 20  | 3  | 20  | 0.2% | 1.00 [0.23, 4.37]  |
| Benoni 2001            | 1  | 18  | 1  | 20  | 0.1% | 1.11 [0.07, 16.49] |
| Bidolegui 2014         | 0  | 25  | 0  | 25  |      | Not estimable      |
| Chareancholvanich 2012 | 0  | 120 | 0  | 120 |      | Not estimable      |
| Chareancholvanich 2011 | 0  | 50  | 0  | 50  |      | Not estimable      |
| Chen 2016              | 0  | 60  | 0  | 60  |      | Not estimable      |
| Chen 2019              | 14 | 88  | 12 | 88  | 1.0% | 1.17 [0.57, 2.38]  |
| Chin 2020              | 1  | 42  | 1  | 39  | 0.1% | 0.93 [0.06, 14.34] |
| Claeys 2007            | 0  | 20  | 0  | 20  |      | Not estimable      |
| Clave 2019             | 1  | 154 | 0  | 75  | 0.1% | 1.47 [0.06, 35.69] |
| Colomina 2016          | 2  | 44  | 1  | 51  | 0.1% | 2.32 [0.22, 24.71] |
| Cvetanovich 2018       | 0  | 52  | 1  | 56  | 0.1% | 0.36 [0.01, 8.61]  |
| Ekbäck 2000            | 1  | 20  | 1  | 20  | 0.1% | 1.00 [0.07, 14.90] |
| Elwatidy 2008          | 0  | 32  | 0  | 32  |      | Not estimable      |
| Emara 2014             | 6  | 20  | 1  | 20  | 0.1% | 6.00 [0.79, 45.42] |
| Engel 2001             | 0  | 12  | 0  | 12  |      | Not estimable      |
| Ezhevskaya 2018        | 0  | 80  | 0  | 80  |      | Not estimable      |
| Farrokhi 2011          | 0  | 38  | 0  | 38  |      | Not estimable      |
| Felli 2019             | 0  | 40  | 0  | 40  |      | Not estimable      |
| Fraval 2017            | 0  | 50  | 0  | 51  |      | Not estimable      |
| Garg 2012              | 0  | 26  | 0  | 26  |      | Not estimable      |
| Garneti 2004           | 1  | 25  | 0  | 25  | 0.1% | 3.00 [0.13, 70.30] |
| Goobie 2018            | 0  | 56  | 0  | 55  |      | Not estimable      |
| Good 2003              | 2  | 27  | 2  | 24  | 0.1% | 0.89 [0.14, 5.83]  |
| Helito 2019            | 0  | 30  | 1  | 30  | 0.1% | 0.33 [0.01, 7.87]  |
| Hiippala 1995          | 1  | 15  | 2  | 13  | 0.1% | 0.43 [0.04, 4.25]  |
| Hiippala 1997          | 2  | 39  | 3  | 38  | 0.2% | 0.65 [0.11, 3.67]  |
| Hsu 2015               | 0  | 30  | 0  | 30  |      | Not estimable      |
| Husted 2003            | 0  | 20  | 0  | 20  |      | Not estimable      |
| Jansen 1999            | 0  | 21  | 1  | 21  | 0.1% | 0.33 [0.01, 7.74]  |
| Jaszczak 2015          | 1  | 61  | 0  | 63  | 0.1% | 3.10 [0.13, 74.58] |
| Johansson 2005         | 0  | 47  | 0  | 53  |      | Not estimable      |
| Kakar 2009             | 0  | 25  | 0  | 25  |      | Not estimable      |
| Karaaslan 2015         | 0  | 53  | 0  | 52  |      | Not estimable      |
| Kazemi 2010            | 0  | 32  | 1  | 32  | 0.1% | 0.33 [0.01, 7.89]  |
| Keyhani 2016           | 0  | 40  | 0  | 40  |      | Not estimable      |
| Kim 2014               | 0  | 90  | 0  | 90  |      | Not estimable      |
| Kim 2017               | 0  | 48  | 2  | 24  | 0.1% | 0.10 [0.01, 2.05]  |
| Kimura 2019            | 0  | 128 | 0  | 128 |      | Not estimable      |
| Kundu 2015             | 3  | 30  | 2  | 30  | 0.2% | 1.50 [0.27, 8.34]  |
| Lack 2017              | 1  | 42  | 0  | 46  | 0.1% | 3.28 [0.14, 78.36] |
| Lee 2012               | 3  | 36  | 4  | 36  | 0.3% | 0.75 [0.18, 3.11]  |
| Lee 2013               | 0  | 34  | 0  | 34  |      | Not estimable      |
| Lei 2020               | 0  | 150 | 0  | 50  |      | Not estimable      |
| Lemay 2004             | 0  | 20  | 0  | 19  |      | Not estimable      |
| Lin 2012               | 1  | 101 | 0  | 50  | 0.1% | 1.50 [0.06, 36.18] |
| Liu 2018               | 23 | 150 | 15 | 74  | 1.5% | 0.76 [0.42, 1.36]  |
| Liu 2020               | 0  | 37  | 0  | 35  |      | Not estimable      |
| Luo 2019               | 1  | 44  | 4  | 46  | 0.1% | 0.26 [0.03, 2.25]  |
| Ma 2019                | 1  | 62  | 0  | 62  | 0.1% | 3.00 [0.12, 72.25] |
| MacGillivray 2011      | 2  | 40  | 0  | 20  | 0.1% | 2.56 [0.13, 50.95] |
| Mahmood 2017           | 0  | 100 | 0  | 73  |      | Not estimable      |
| Maniar 2012            | 0  | 160 | 0  | 40  |      | Not estimable      |
| Molloy 2005            | 0  | 50  | 0  | 50  |      | Not estimable      |
| Motifard 2015          | 0  | 45  | 0  | 45  |      | Not estimable      |
| Mu 2019                | 0  | 45  | 0  | 42  |      | Not estimable      |
| Na 2016                | 0  | 29  | 0  | 26  |      | Not estimable      |
| Nagabhushan 2018       | 0  | 25  | 0  | 25  |      | Not estimable      |
| Neilipovitz 2001       | 0  | 22  | 0  | 18  |      | Not estimable      |
| Niskanen 2005          | 0  | 19  | 0  | 20  |      | Not estimable      |
| Nugent 2019            | 0  | 18  | 0  | 23  |      | Not estimable      |

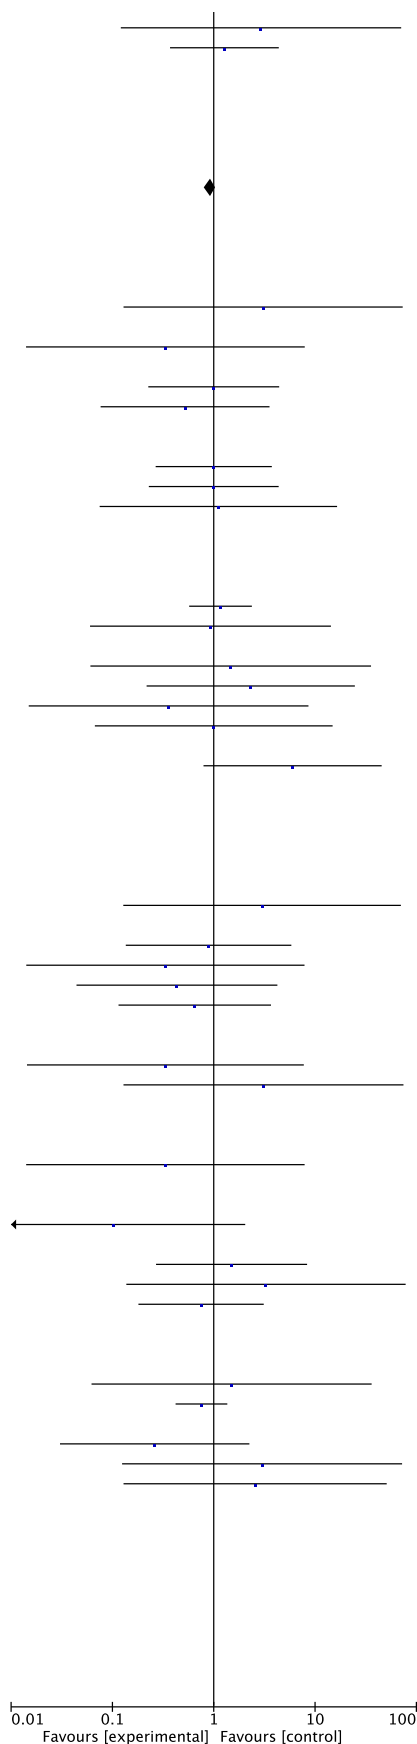

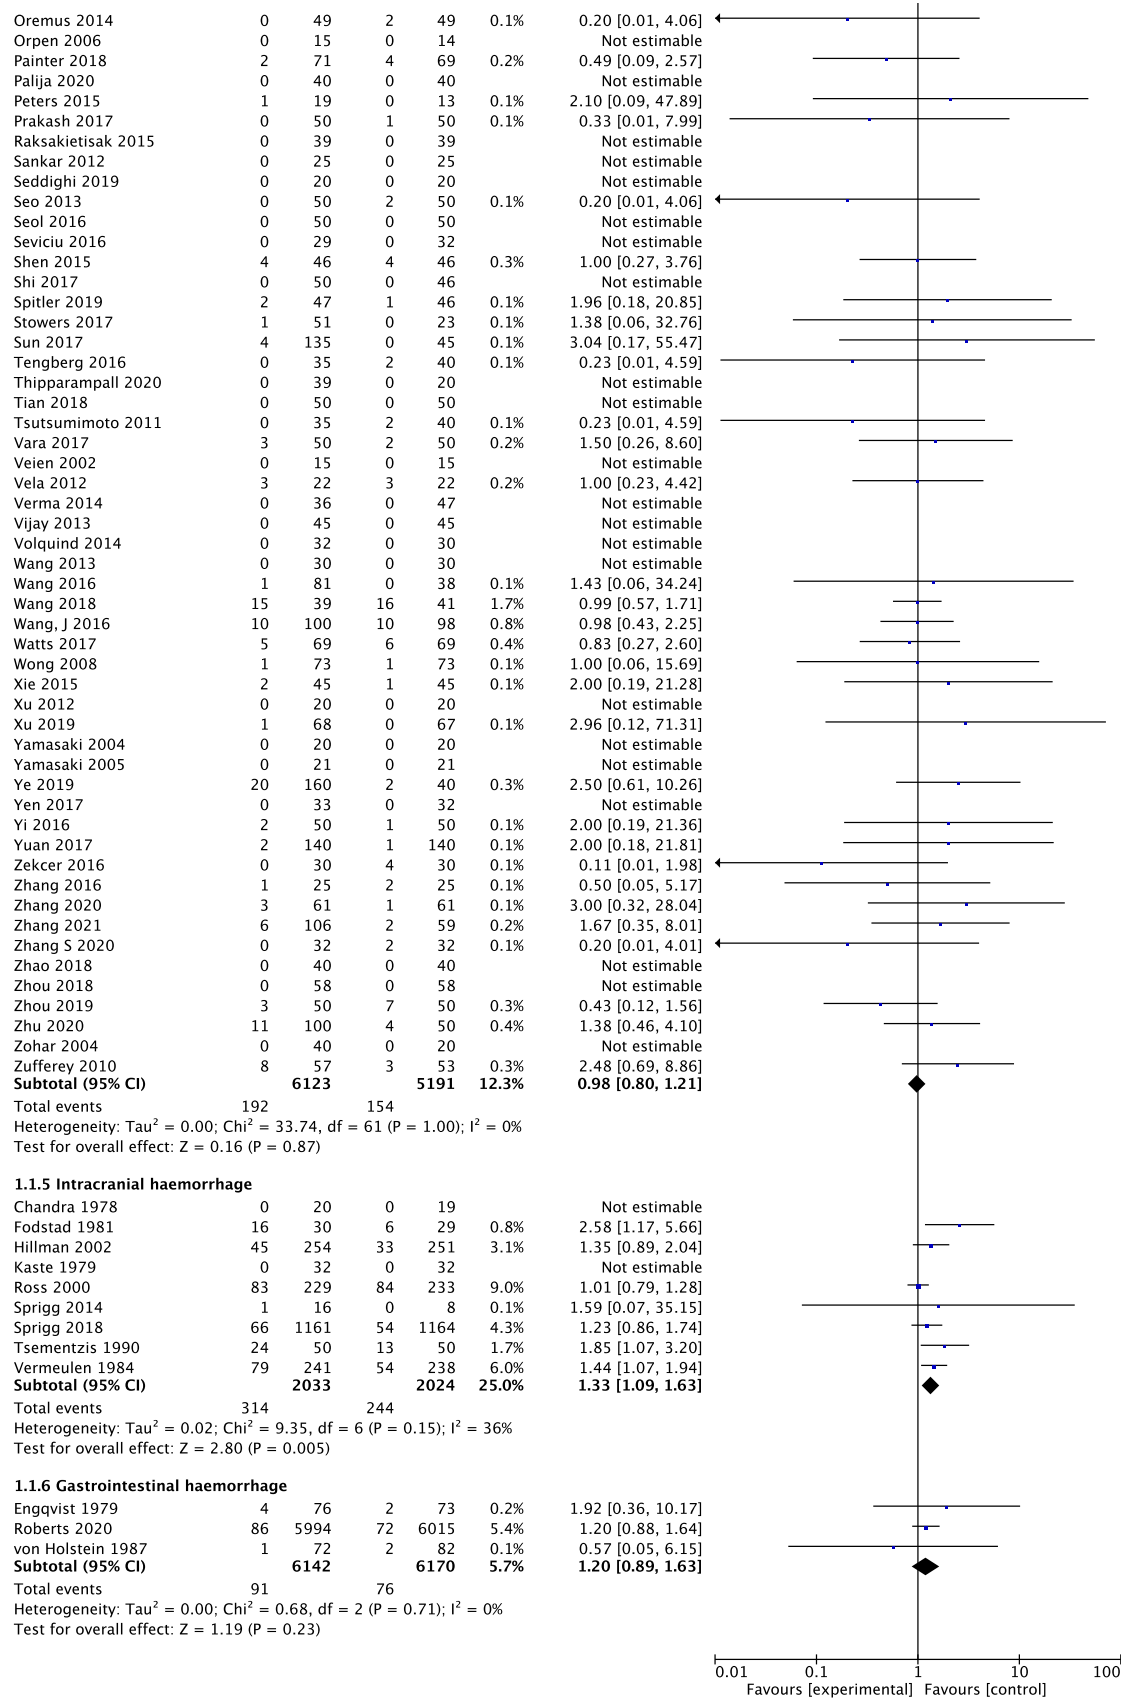

**1.1.7 Others**

|                          |   |            |   |            |             |                          |
|--------------------------|---|------------|---|------------|-------------|--------------------------|
| Alimian 2011             | 0 | 42         | 0 | 42         |             | Not estimable            |
| Apipan 2018              | 0 | 60         | 0 | 20         |             | Not estimable            |
| Auvinen 1987             | 0 | 39         | 0 | 37         |             | Not estimable            |
| Avvisati 1989            | 0 | 6          | 0 | 6          |             | Not estimable            |
| Boylan 1996              | 0 | 25         | 0 | 20         |             | Not estimable            |
| Cansancao 2018           | 0 | 10         | 0 | 10         |             | Not estimable            |
| Choi 2009                | 0 | 32         | 0 | 29         |             | Not estimable            |
| Christabel 2014          | 0 | 25         | 0 | 24         |             | Not estimable            |
| Cohen 2021               | 0 | 27         | 0 | 17         |             | Not estimable            |
| Crescenti 2011           | 2 | 100        | 5 | 100        | 0.2%        | 0.40 [0.08, 2.01]        |
| Dadure 2011              | 0 | 19         | 0 | 20         |             | Not estimable            |
| Eldaba 2013              | 0 | 50         | 0 | 50         |             | Not estimable            |
| Fenger-Eriksen 2019      | 0 | 15         | 0 | 15         |             | Not estimable            |
| Goobie 2011              | 0 | 23         | 0 | 20         |             | Not estimable            |
| Kulkarni 2016            | 0 | 120        | 0 | 120        |             | Not estimable            |
| Meng 2019                | 0 | 30         | 0 | 30         |             | Not estimable            |
| Prasad 2018              | 0 | 40         | 0 | 20         |             | Not estimable            |
| Ramezani 2005            | 0 | 32         | 0 | 30         |             | Not estimable            |
| Vel 2015                 | 0 | 50         | 0 | 50         |             | Not estimable            |
| Wu 2006                  | 0 | 108        | 0 | 106        |             | Not estimable            |
| Zaman 2019               | 0 | 88         | 0 | 88         |             | Not estimable            |
| <b>Subtotal (95% CI)</b> |   | <b>941</b> |   | <b>854</b> | <b>0.2%</b> | <b>0.40 [0.08, 2.01]</b> |

Total events 2 5  
Heterogeneity: Not applicable  
Test for overall effect:  $Z = 1.11$  ( $P = 0.27$ )

**Total (95% CI) 52103 50211 100.0% 1.00 [0.93, 1.08]**

Total events 1342 1278  
Heterogeneity:  $\tau^2 = 0.00$ ;  $\chi^2 = 81.71$ ,  $df = 106$  ( $P = 0.96$ );  $I^2 = 0\%$   
Test for overall effect:  $Z = 0.11$  ( $P = 0.91$ )  
Test for subgroup differences:  $\chi^2 = 13.60$ ,  $df = 6$  ( $P = 0.03$ ),  $I^2 = 55.9\%$

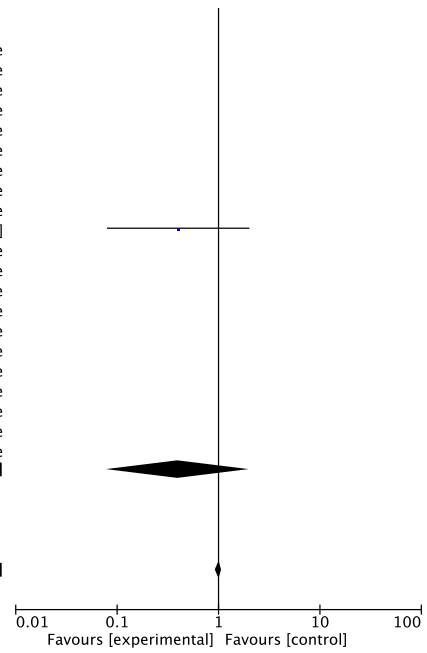

**Figure S6.** Forest plot of the thrombotic events: subgroup analysis by TXA (tranexamic acid) dose.

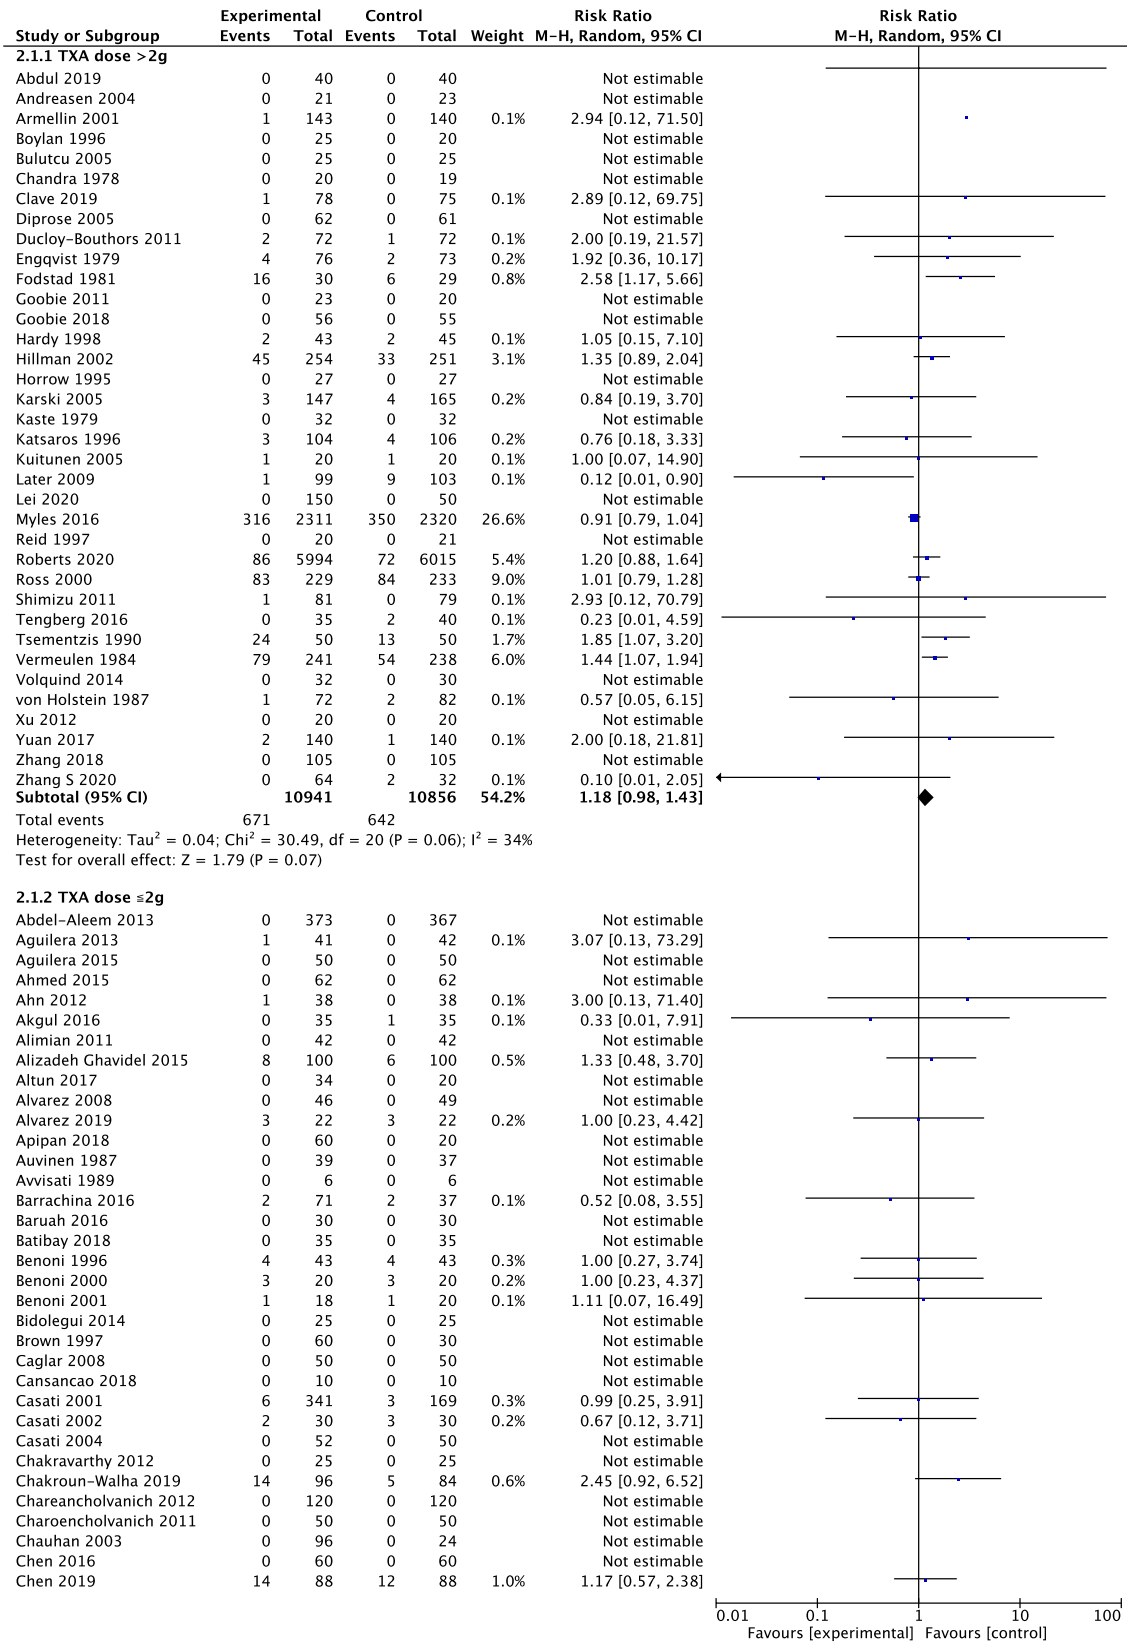

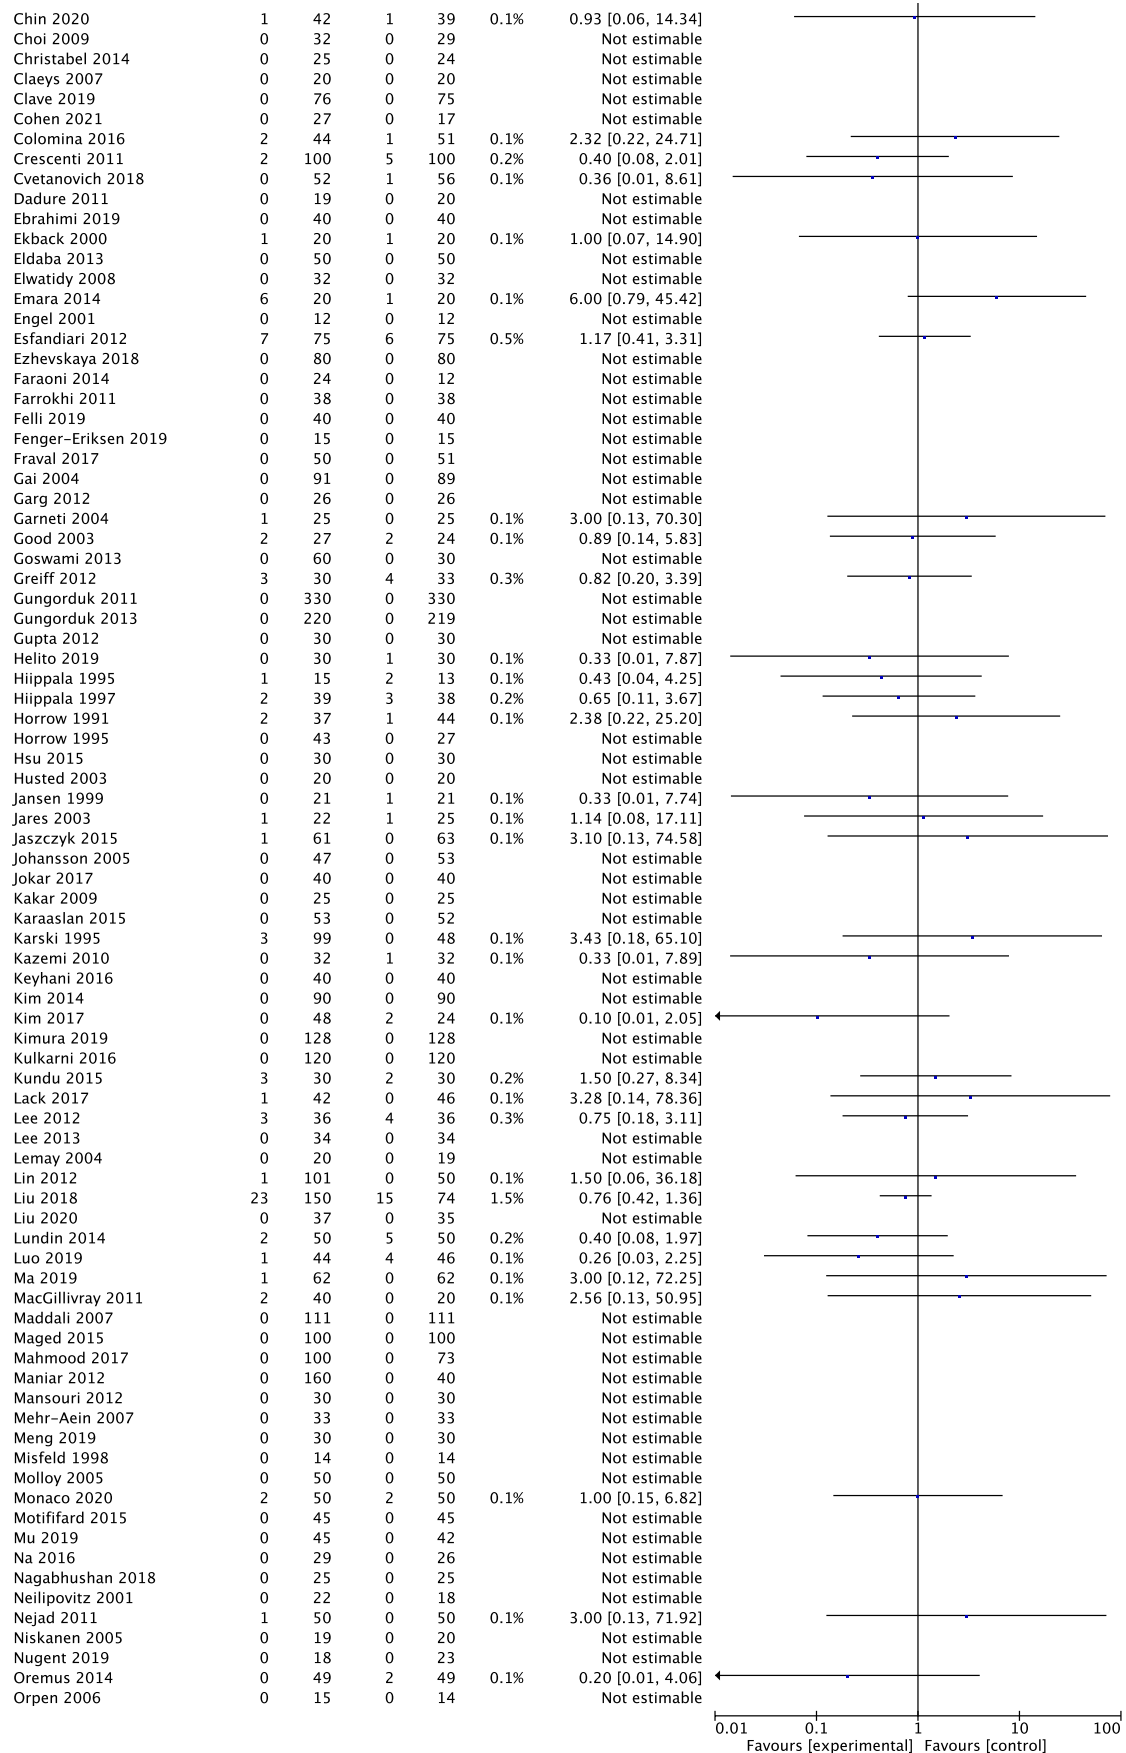



|                                                                                                           |     |              |     |              |              |                          |
|-----------------------------------------------------------------------------------------------------------|-----|--------------|-----|--------------|--------------|--------------------------|
| Painter 2018                                                                                              | 2   | 71           | 4   | 69           | 0.2%         | 0.49 [0.09, 2.57]        |
| Paliya 2020                                                                                               | 0   | 40           | 0   | 40           |              | Not estimable            |
| Peters 2015                                                                                               | 1   | 19           | 0   | 13           | 0.1%         | 2.10 [0.09, 47.89]       |
| Pleym 2003                                                                                                | 0   | 40           | 1   | 40           | 0.1%         | 0.33 [0.01, 7.95]        |
| Prakash 2017                                                                                              | 0   | 50           | 1   | 50           | 0.1%         | 0.33 [0.01, 7.99]        |
| Prasad 2018                                                                                               | 0   | 40           | 0   | 20           |              | Not estimable            |
| Raksakietisak 2015                                                                                        | 0   | 39           | 0   | 39           |              | Not estimable            |
| Ramezani 2005                                                                                             | 0   | 32           | 0   | 30           |              | Not estimable            |
| Ray 2016                                                                                                  | 0   | 50           | 0   | 50           |              | Not estimable            |
| Roberts 2019                                                                                              | 101 | 6406         | 102 | 6331         | 7.1%         | 0.98 [0.74, 1.29]        |
| Rowell 2020                                                                                               | 44  | 657          | 30  | 309          | 2.7%         | 0.69 [0.44, 1.08]        |
| Sahu 2019                                                                                                 | 0   | 50           | 0   | 50           |              | Not estimable            |
| Sallam 2019                                                                                               | 0   | 43           | 0   | 43           |              | Not estimable            |
| Sankar 2012                                                                                               | 0   | 25           | 0   | 25           |              | Not estimable            |
| Santos 2006                                                                                               | 2   | 29           | 2   | 31           | 0.1%         | 1.07 [0.16, 7.10]        |
| Seddighi 2019                                                                                             | 0   | 20           | 0   | 20           |              | Not estimable            |
| Sentilhes 2018                                                                                            | 1   | 1945         | 4   | 1946         | 0.1%         | 0.25 [0.03, 2.24]        |
| Senturk 2013                                                                                              | 0   | 101          | 0   | 122          |              | Not estimable            |
| Seo 2013                                                                                                  | 0   | 50           | 2   | 50           | 0.1%         | 0.20 [0.01, 4.06]        |
| Seol 2016                                                                                                 | 0   | 50           | 0   | 50           |              | Not estimable            |
| Seviciu 2016                                                                                              | 0   | 29           | 0   | 32           |              | Not estimable            |
| Shaaban 2016                                                                                              | 0   | 66           | 0   | 66           |              | Not estimable            |
| Shahid 2013                                                                                               | 0   | 38           | 0   | 36           |              | Not estimable            |
| Shakur 2010                                                                                               | 168 | 10093        | 201 | 10114        | 12.8%        | 0.84 [0.68, 1.03]        |
| Shakur 2017                                                                                               | 30  | 10051        | 34  | 10009        | 2.2%         | 0.88 [0.54, 1.43]        |
| Shen 2015                                                                                                 | 4   | 46           | 4   | 46           | 0.3%         | 1.00 [0.27, 3.76]        |
| Shi 2013                                                                                                  | 5   | 274          | 7   | 278          | 0.4%         | 0.72 [0.23, 2.26]        |
| Shi 2017                                                                                                  | 0   | 50           | 0   | 46           |              | Not estimable            |
| Shi, J 2013                                                                                               | 3   | 58           | 3   | 59           | 0.2%         | 1.02 [0.21, 4.83]        |
| Shore-Lesserson 1996                                                                                      | 5   | 17           | 3   | 13           | 0.3%         | 1.27 [0.37, 4.39]        |
| Spitler 2019                                                                                              | 2   | 47           | 1   | 46           | 0.1%         | 1.96 [0.18, 20.85]       |
| Sprigg 2014                                                                                               | 1   | 16           | 0   | 8            | 0.1%         | 1.59 [0.07, 35.15]       |
| Sprigg 2018                                                                                               | 66  | 1161         | 54  | 1164         | 4.3%         | 1.23 [0.86, 1.74]        |
| Stowers 2017                                                                                              | 1   | 51           | 0   | 23           | 0.1%         | 1.38 [0.06, 32.76]       |
| Sun 2017                                                                                                  | 4   | 135          | 0   | 45           | 0.1%         | 3.04 [0.17, 55.47]       |
| Taghaddomi 2009                                                                                           | 0   | 50           | 0   | 50           |              | Not estimable            |
| Thipparampall 2020                                                                                        | 0   | 39           | 0   | 20           |              | Not estimable            |
| Tian 2018                                                                                                 | 0   | 50           | 0   | 50           |              | Not estimable            |
| Topsoe 2016                                                                                               | 0   | 165          | 0   | 167          |              | Not estimable            |
| Tsutsumimoto 2011                                                                                         | 0   | 35           | 2   | 40           | 0.1%         | 0.23 [0.01, 4.59]        |
| Vanek 2005                                                                                                | 0   | 39           | 0   | 20           |              | Not estimable            |
| Vara 2017                                                                                                 | 3   | 50           | 2   | 50           | 0.2%         | 1.50 [0.26, 8.60]        |
| Veien 2002                                                                                                | 0   | 15           | 0   | 15           |              | Not estimable            |
| Vel 2015                                                                                                  | 0   | 50           | 0   | 50           |              | Not estimable            |
| Vela 2012                                                                                                 | 3   | 22           | 3   | 22           | 0.2%         | 1.00 [0.23, 4.42]        |
| Verma 2014                                                                                                | 0   | 36           | 0   | 47           |              | Not estimable            |
| Vijay 2013                                                                                                | 0   | 45           | 0   | 45           |              | Not estimable            |
| Wang 2012                                                                                                 | 0   | 116          | 0   | 115          |              | Not estimable            |
| Wang 2013                                                                                                 | 0   | 30           | 0   | 30           |              | Not estimable            |
| Wang 2016                                                                                                 | 1   | 81           | 0   | 38           | 0.1%         | 1.43 [0.06, 34.24]       |
| Wang 2018                                                                                                 | 15  | 39           | 16  | 41           | 1.7%         | 0.99 [0.57, 1.71]        |
| Wang, J 2016                                                                                              | 10  | 100          | 10  | 98           | 0.8%         | 0.98 [0.43, 2.25]        |
| Watts 2017                                                                                                | 5   | 69           | 6   | 69           | 0.4%         | 0.83 [0.27, 2.60]        |
| Wei 2006                                                                                                  | 0   | 36           | 0   | 40           |              | Not estimable            |
| Wong 2008                                                                                                 | 1   | 73           | 1   | 73           | 0.1%         | 1.00 [0.06, 15.69]       |
| Wu 2006                                                                                                   | 0   | 108          | 0   | 106          |              | Not estimable            |
| Xie 2015                                                                                                  | 2   | 45           | 1   | 45           | 0.1%         | 2.00 [0.19, 21.28]       |
| Xu 2013                                                                                                   | 2   | 88           | 2   | 86           | 0.1%         | 0.98 [0.14, 6.78]        |
| Xu 2019                                                                                                   | 1   | 68           | 0   | 67           | 0.1%         | 2.96 [0.12, 71.31]       |
| Yamasaki 2004                                                                                             | 0   | 20           | 0   | 20           |              | Not estimable            |
| Yamasaki 2005                                                                                             | 0   | 21           | 0   | 21           |              | Not estimable            |
| Ye 2019                                                                                                   | 20  | 160          | 2   | 40           | 0.3%         | 2.50 [0.61, 10.26]       |
| Yen 2017                                                                                                  | 0   | 33           | 0   | 32           |              | Not estimable            |
| Yi 2016                                                                                                   | 2   | 50           | 1   | 50           | 0.1%         | 2.00 [0.19, 21.36]       |
| Yutthakasemsunt 2013                                                                                      | 0   | 120          | 3   | 118          | 0.1%         | 0.14 [0.01, 2.69]        |
| Zabeeda 2002                                                                                              | 0   | 25           | 0   | 25           |              | Not estimable            |
| Zaman 2019                                                                                                | 0   | 88           | 0   | 88           |              | Not estimable            |
| Zekcer 2016                                                                                               | 0   | 30           | 4   | 30           | 0.1%         | 0.11 [0.01, 1.98]        |
| Zhang 2016                                                                                                | 1   | 25           | 2   | 25           | 0.1%         | 0.50 [0.05, 5.17]        |
| Zhang 2020                                                                                                | 3   | 61           | 1   | 61           | 0.1%         | 3.00 [0.32, 28.04]       |
| Zhang 2021                                                                                                | 6   | 106          | 2   | 59           | 0.2%         | 1.67 [0.35, 8.01]        |
| Zhang S 2020                                                                                              | 0   | 32           | 2   | 32           | 0.1%         | 0.20 [0.01, 4.01]        |
| Zhao 2018                                                                                                 | 0   | 40           | 0   | 40           |              | Not estimable            |
| Zhou 2018                                                                                                 | 0   | 58           | 0   | 58           |              | Not estimable            |
| Zhou 2019                                                                                                 | 3   | 50           | 7   | 50           | 0.3%         | 0.43 [0.12, 1.56]        |
| Zhu 2020                                                                                                  | 11  | 100          | 4   | 50           | 0.4%         | 1.38 [0.46, 4.10]        |
| Zohar 2004                                                                                                | 0   | 40           | 0   | 20           |              | Not estimable            |
| Zufferey 2010                                                                                             | 8   | 57           | 3   | 53           | 0.3%         | 2.48 [0.69, 8.86]        |
| <b>Subtotal (95% CI)</b>                                                                                  |     | <b>41175</b> |     | <b>39489</b> | <b>45.8%</b> | <b>0.94 [0.84, 1.05]</b> |
| Total events                                                                                              | 671 |              | 638 |              |              |                          |
| Heterogeneity: Tau <sup>2</sup> = 0.00; Chi <sup>2</sup> = 51.10, df = 86 (P = 1.00); I <sup>2</sup> = 0% |     |              |     |              |              |                          |
| Test for overall effect: Z = 1.15 (P = 0.25)                                                              |     |              |     |              |              |                          |

**Total (95% CI)** 52116 50345 100.0% 1.00 [0.93, 1.08]  
 Total events 1342 1280  
 Heterogeneity: Tau<sup>2</sup> = 0.00; Chi<sup>2</sup> = 84.32, df = 107 (P = 0.95); I<sup>2</sup> = 0%  
 Test for overall effect: Z = 0.09 (P = 0.93)  
 Test for subgroup differences: Chi<sup>2</sup> = 4.50, df = 1 (P = 0.03), I<sup>2</sup> = 77.8%

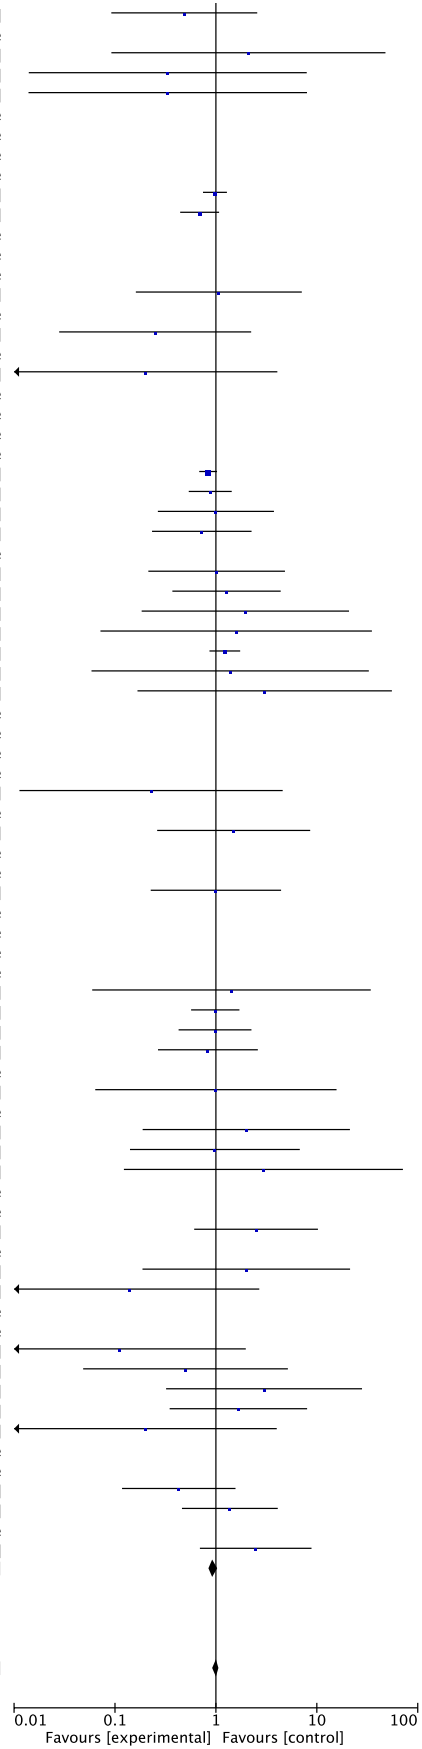

**Figure S7.** Forest plot of the thrombotic events: subgroup analysis in children.

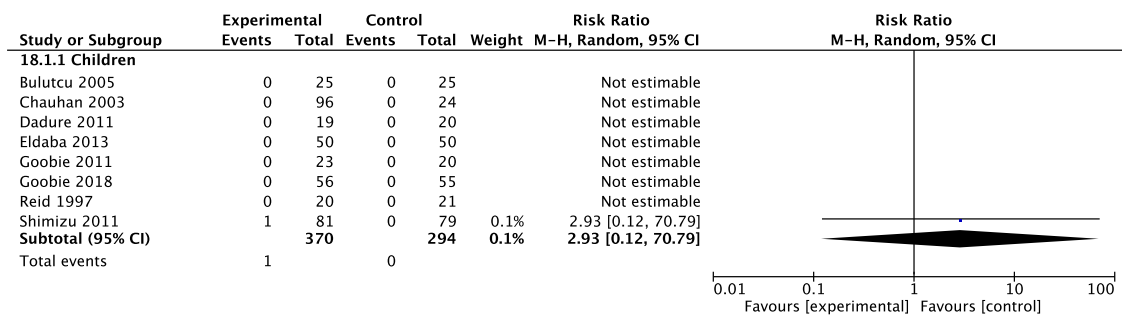

**Figure S8.** Forest plot of the seizures: subgroup analysis by underlying disease

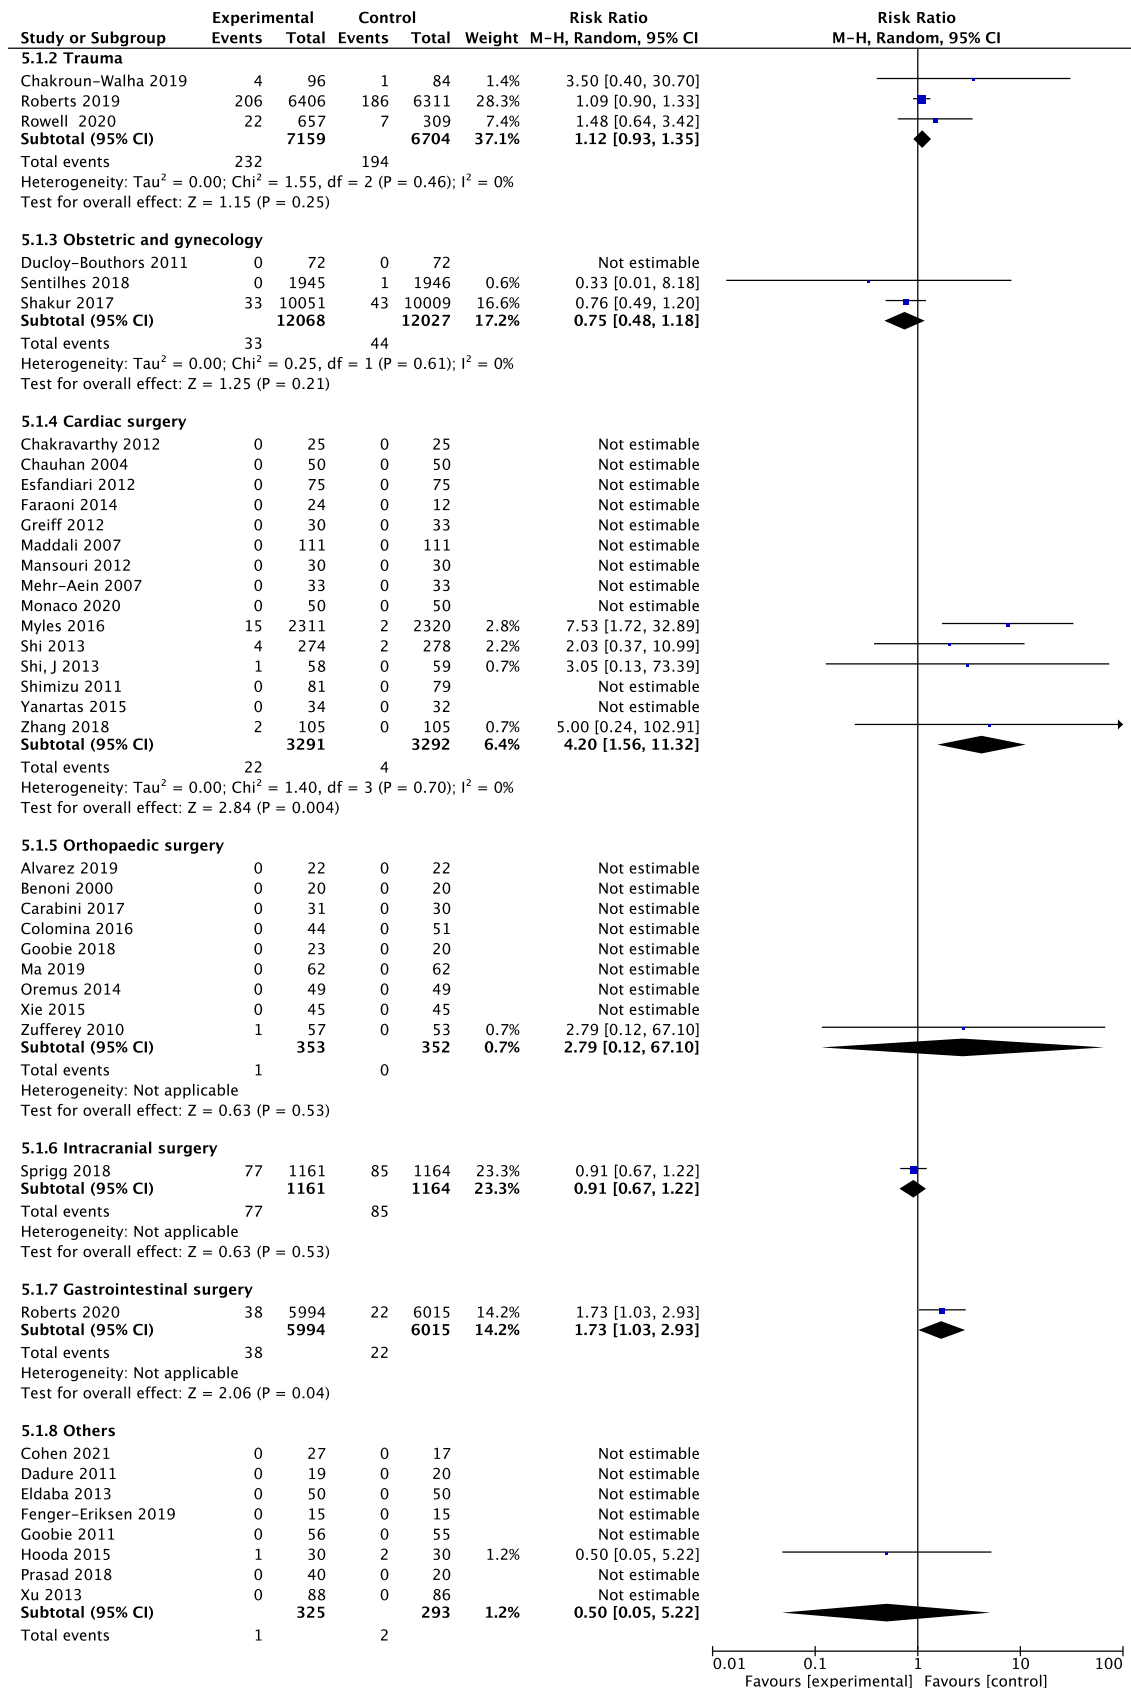

Heterogeneity: Not applicable  
Test for overall effect:  $Z = 0.58$  ( $P = 0.56$ )

|                       |              |              |               |                          |
|-----------------------|--------------|--------------|---------------|--------------------------|
| <b>Total (95% CI)</b> | <b>30351</b> | <b>29847</b> | <b>100.0%</b> | <b>1.18 [0.91, 1.53]</b> |
| Total events          | 404          | 351          |               |                          |

Heterogeneity:  $\text{Tau}^2 = 0.05$ ;  $\text{Chi}^2 = 18.31$ ,  $df = 12$  ( $P = 0.11$ );  $I^2 = 34\%$   
Test for overall effect:  $Z = 1.24$  ( $P = 0.21$ )  
Test for subgroup differences:  $\text{Chi}^2 = 15.05$ ,  $df = 6$  ( $P = 0.02$ ),  $I^2 = 60.1\%$

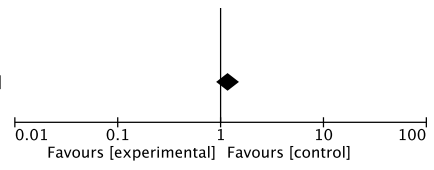

**Figure S9.** Forest plot of the seizures: subgroup analysis by TXA (tranexamic acid) dose.

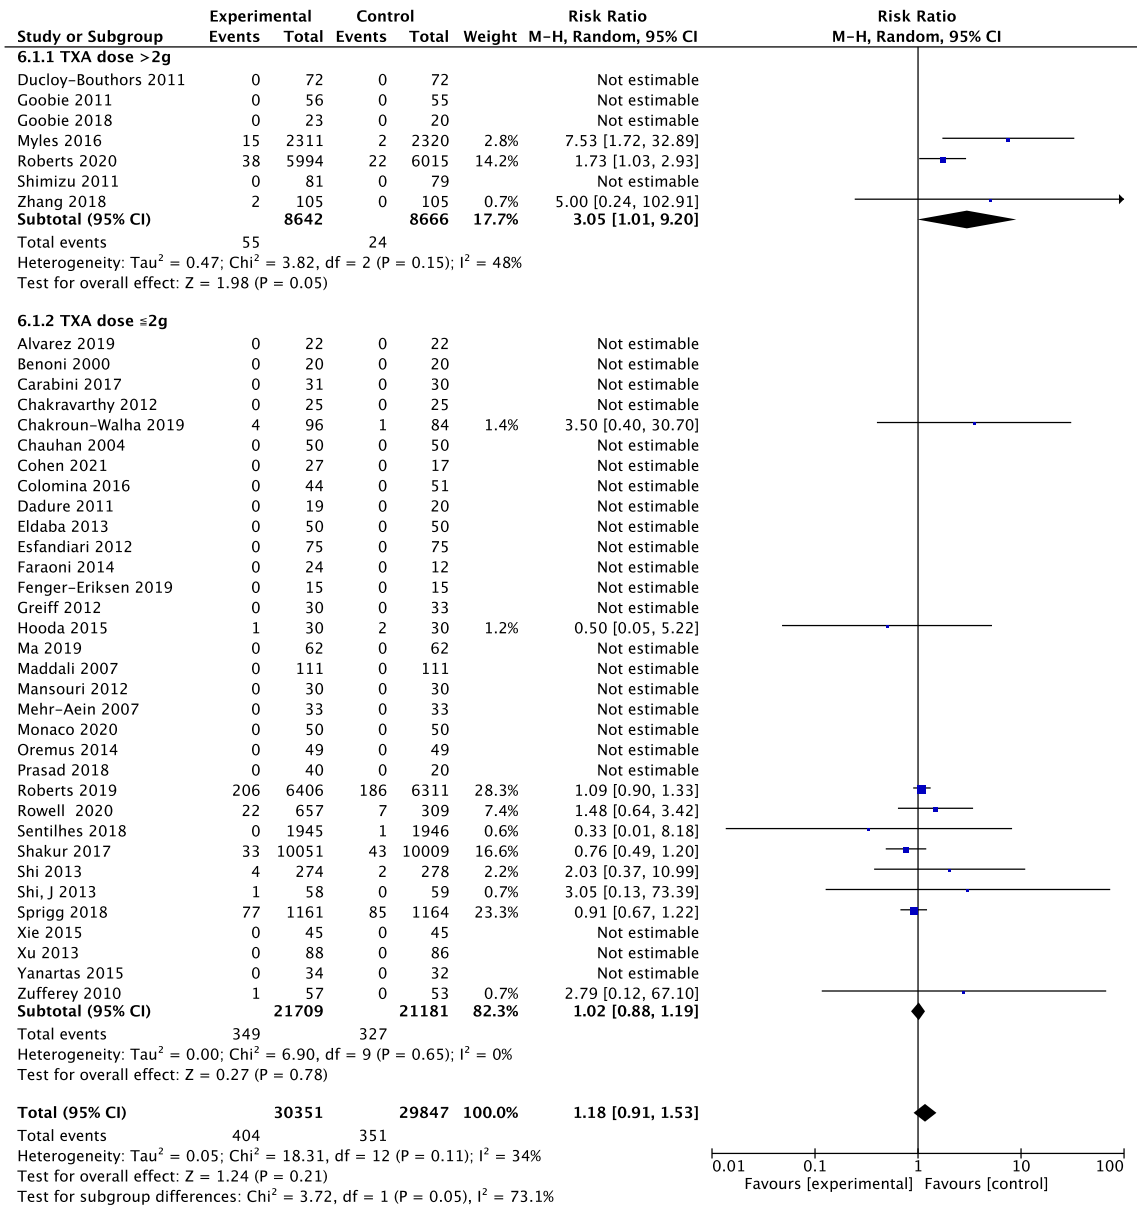

**Figure S10.** Forest plot of the seizures: subgroup analysis in children.

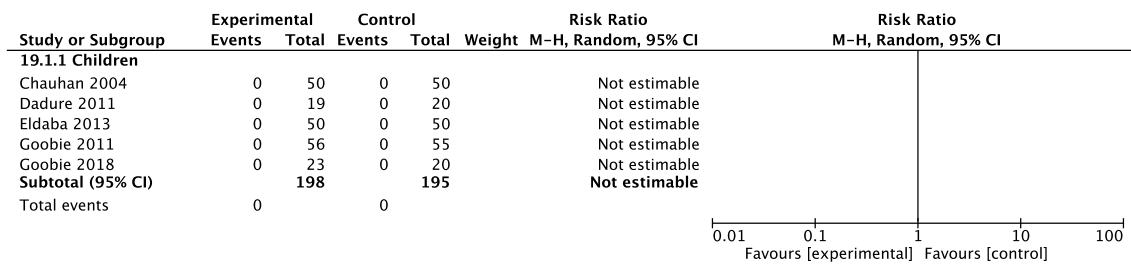

**Figure S11.** Forest plot of the venous thromboembolism: subgroup analysis by underlying disease.

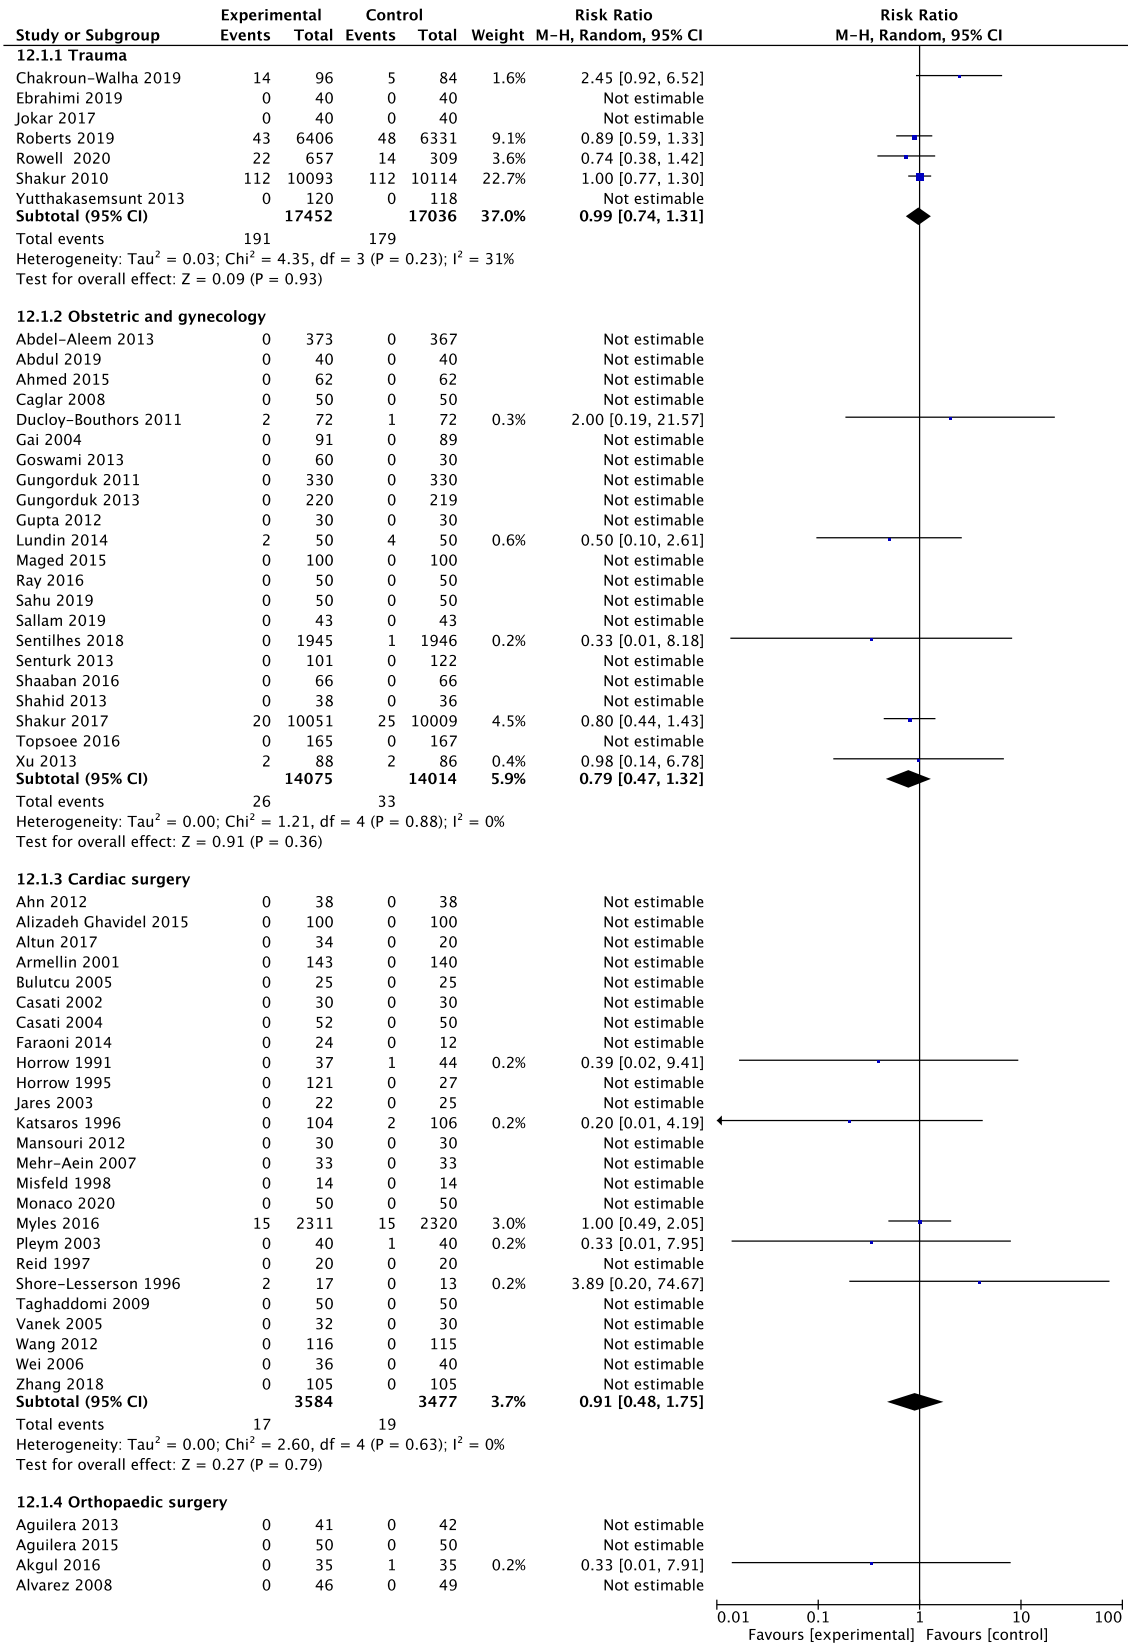

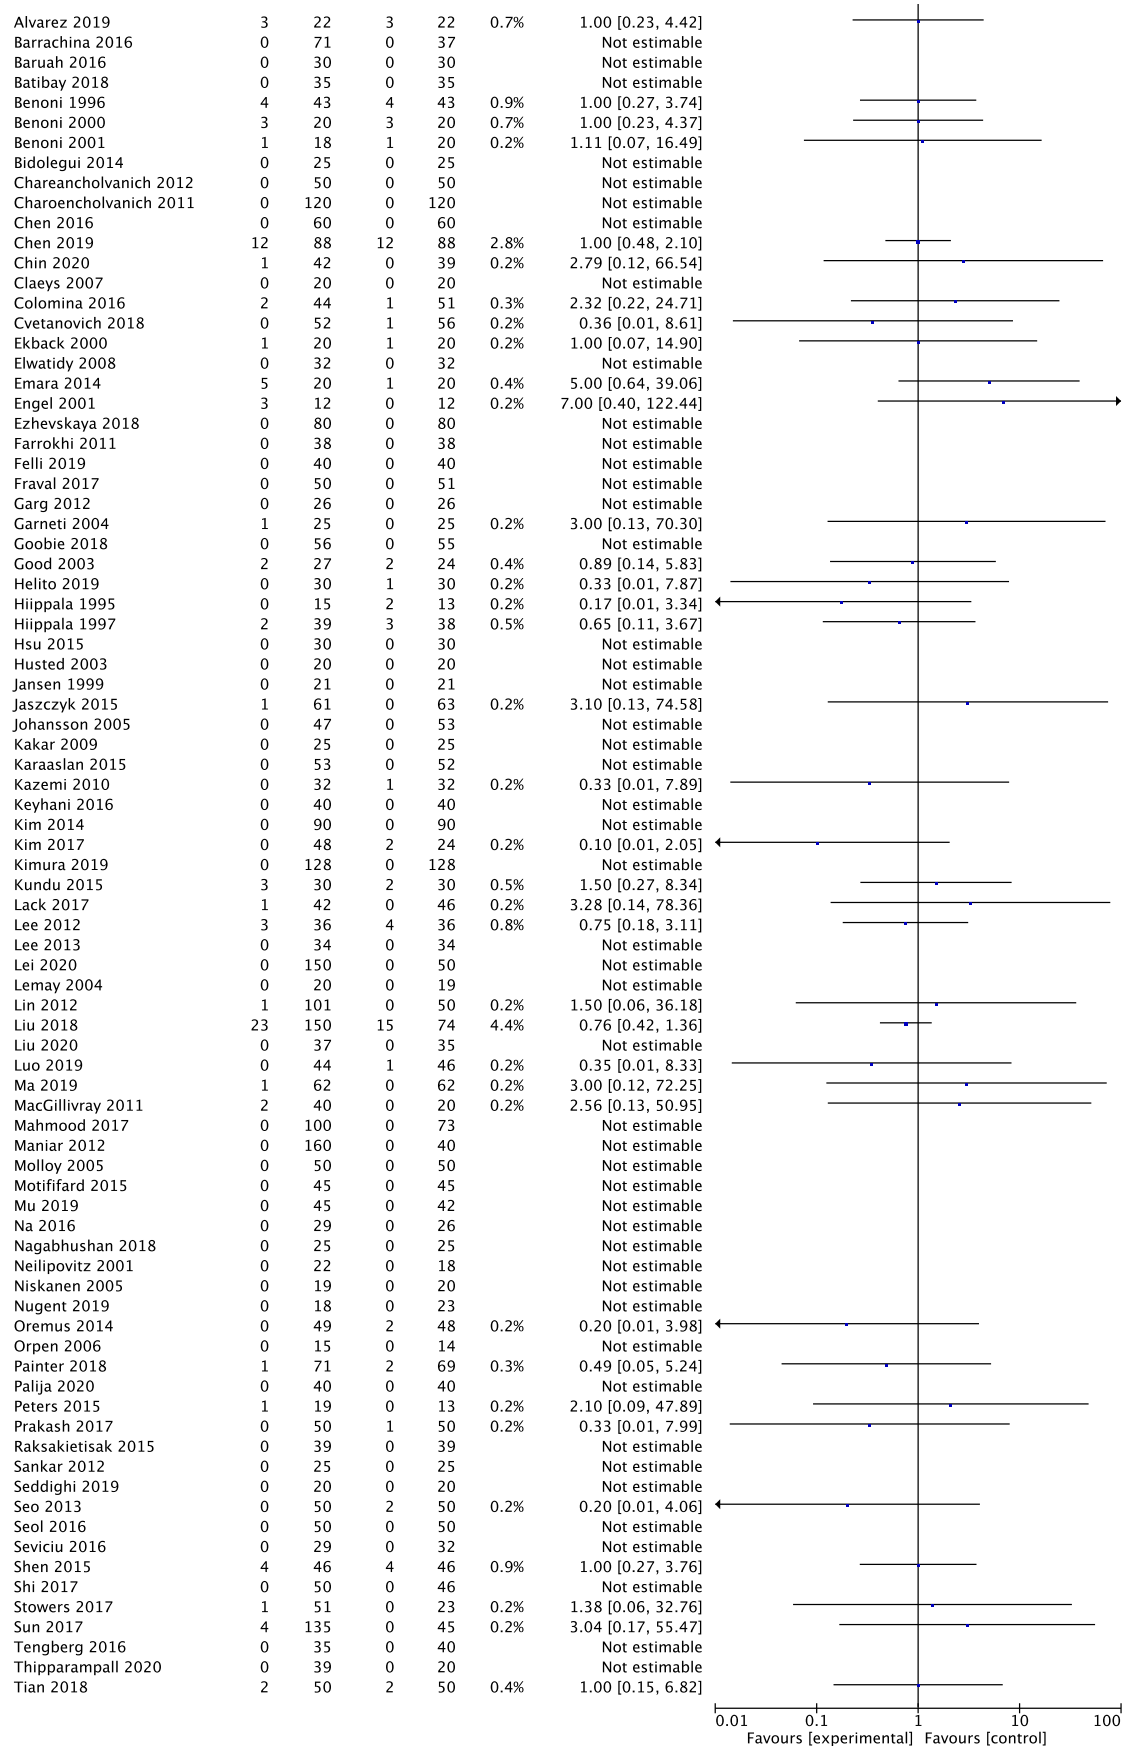



|                                                                                                           |     |             |     |             |              |                          |
|-----------------------------------------------------------------------------------------------------------|-----|-------------|-----|-------------|--------------|--------------------------|
| Tsutsumimoto 2011                                                                                         | 0   | 20          | 0   | 20          |              | Not estimable            |
| Vara 2017                                                                                                 | 0   | 53          | 0   | 49          |              | Not estimable            |
| Veien 2002                                                                                                | 0   | 15          | 0   | 15          |              | Not estimable            |
| Vela 2012                                                                                                 | 3   | 22          | 3   | 22          | 0.7%         | 1.00 [0.23, 4.42]        |
| Verma 2014                                                                                                | 0   | 36          | 0   | 47          |              | Not estimable            |
| Vijay 2013                                                                                                | 0   | 45          | 0   | 45          |              | Not estimable            |
| Volquind 2014                                                                                             | 0   | 32          | 0   | 30          |              | Not estimable            |
| Wang 2013                                                                                                 | 0   | 30          | 0   | 30          |              | Not estimable            |
| Wang 2016                                                                                                 | 1   | 81          | 0   | 38          | 0.2%         | 1.43 [0.06, 34.24]       |
| Wang 2018                                                                                                 | 15  | 39          | 16  | 41          | 5.1%         | 0.99 [0.57, 1.71]        |
| Wang, J 2016                                                                                              | 10  | 100         | 10  | 98          | 2.2%         | 0.98 [0.43, 2.25]        |
| Watts 2017                                                                                                | 2   | 69          | 3   | 69          | 0.5%         | 0.67 [0.11, 3.87]        |
| Wong 2008                                                                                                 | 0   | 73          | 1   | 73          | 0.2%         | 0.33 [0.01, 8.05]        |
| Xie 2015                                                                                                  | 1   | 45          | 1   | 45          | 0.2%         | 1.00 [0.06, 15.50]       |
| Xu 2012                                                                                                   | 0   | 20          | 0   | 20          |              | Not estimable            |
| Xu 2019                                                                                                   | 1   | 68          | 0   | 67          | 0.2%         | 2.96 [0.12, 71.31]       |
| Yamasaki 2004                                                                                             | 0   | 20          | 0   | 20          |              | Not estimable            |
| Yamasaki 2005                                                                                             | 0   | 21          | 0   | 21          |              | Not estimable            |
| Ye 2019                                                                                                   | 20  | 160         | 2   | 40          | 0.8%         | 2.50 [0.61, 10.26]       |
| Yen 2017                                                                                                  | 0   | 33          | 0   | 32          |              | Not estimable            |
| Yi 2016                                                                                                   | 2   | 50          | 1   | 50          | 0.3%         | 2.00 [0.19, 21.36]       |
| Yuan 2017                                                                                                 | 2   | 140         | 1   | 140         | 0.3%         | 2.00 [0.18, 21.81]       |
| Zekcer 2016                                                                                               | 0   | 30          | 4   | 30          | 0.2%         | 0.11 [0.01, 1.98]        |
| Zhang 2016                                                                                                | 1   | 25          | 2   | 25          | 0.3%         | 0.50 [0.05, 5.17]        |
| Zhang 2020                                                                                                | 3   | 61          | 1   | 61          | 0.3%         | 3.00 [0.32, 28.04]       |
| Zhang 2021                                                                                                | 6   | 106         | 2   | 59          | 0.6%         | 1.67 [0.35, 8.01]        |
| Zhang S 2020                                                                                              | 0   | 32          | 2   | 32          | 0.2%         | 0.20 [0.01, 4.01]        |
| Zhao 2018                                                                                                 | 0   | 40          | 0   | 40          |              | Not estimable            |
| Zhou 2018                                                                                                 | 0   | 58          | 0   | 58          |              | Not estimable            |
| Zhou 2019                                                                                                 | 2   | 50          | 3   | 50          | 0.5%         | 0.67 [0.12, 3.82]        |
| Zhu 2020                                                                                                  | 11  | 100         | 4   | 50          | 1.3%         | 1.38 [0.46, 4.10]        |
| Zohar 2004                                                                                                | 0   | 40          | 0   | 20          |              | Not estimable            |
| Zufferey 2010                                                                                             | 5   | 57          | 3   | 53          | 0.8%         | 1.55 [0.39, 6.17]        |
| <b>Subtotal (95% CI)</b>                                                                                  |     | <b>5910</b> |     | <b>5048</b> | <b>32.3%</b> | <b>1.00 [0.80, 1.24]</b> |
| Total events                                                                                              | 173 |             | 133 |             |              |                          |
| Heterogeneity: Tau <sup>2</sup> = 0.00; Chi <sup>2</sup> = 27.91, df = 55 (P = 1.00); I <sup>2</sup> = 0% |     |             |     |             |              |                          |
| Test for overall effect: Z = 0.04 (P = 0.97)                                                              |     |             |     |             |              |                          |

#### 12.1.5 Intracranial haemorrhage

|                                                                                                         |    |             |    |             |              |                          |
|---------------------------------------------------------------------------------------------------------|----|-------------|----|-------------|--------------|--------------------------|
| Chandra 1978                                                                                            | 0  | 20          | 0  | 19          |              | Not estimable            |
| Fodstad 1981                                                                                            | 6  | 30          | 3  | 29          | 0.9%         | 1.93 [0.53, 7.01]        |
| Kaste 1979                                                                                              | 0  | 32          | 0  | 32          |              | Not estimable            |
| Ross 2000                                                                                               | 4  | 229         | 0  | 233         | 0.2%         | 9.16 [0.50, 169.11]      |
| Sprigg 2014                                                                                             | 1  | 16          | 0  | 8           | 0.2%         | 1.59 [0.07, 35.15]       |
| Sprigg 2018                                                                                             | 39 | 1161        | 37 | 1164        | 7.9%         | 1.06 [0.68, 1.64]        |
| Tsimentzis 1990                                                                                         | 0  | 50          | 0  | 50          |              | Not estimable            |
| Vermeulen 1984                                                                                          | 20 | 241         | 18 | 238         | 4.1%         | 1.10 [0.60, 2.02]        |
| <b>Subtotal (95% CI)</b>                                                                                |    | <b>1779</b> |    | <b>1773</b> | <b>13.2%</b> | <b>1.15 [0.82, 1.62]</b> |
| Total events                                                                                            | 70 |             | 58 |             |              |                          |
| Heterogeneity: Tau <sup>2</sup> = 0.00; Chi <sup>2</sup> = 2.80, df = 4 (P = 0.59); I <sup>2</sup> = 0% |    |             |    |             |              |                          |
| Test for overall effect: Z = 0.83 (P = 0.41)                                                            |    |             |    |             |              |                          |

#### 12.1.6 Gastrointestinal haemorrhage

|                                                                                                         |    |             |    |             |             |                          |
|---------------------------------------------------------------------------------------------------------|----|-------------|----|-------------|-------------|--------------------------|
| Engqvist 1979                                                                                           | 2  | 76          | 0  | 73          | 0.2%        | 4.81 [0.23, 98.42]       |
| Roberts 2020                                                                                            | 51 | 5994        | 28 | 6015        | 7.3%        | 1.83 [1.15, 2.89]        |
| von Holstein 1987                                                                                       | 1  | 72          | 0  | 82          | 0.2%        | 3.41 [0.14, 82.44]       |
| <b>Subtotal (95% CI)</b>                                                                                |    | <b>6142</b> |    | <b>6170</b> | <b>7.6%</b> | <b>1.89 [1.21, 2.96]</b> |
| Total events                                                                                            | 54 |             | 28 |             |             |                          |
| Heterogeneity: Tau <sup>2</sup> = 0.00; Chi <sup>2</sup> = 0.52, df = 2 (P = 0.77); I <sup>2</sup> = 0% |    |             |    |             |             |                          |
| Test for overall effect: Z = 2.78 (P = 0.006)                                                           |    |             |    |             |             |                          |

#### 12.1.7 Others

|                          |   |             |   |            |             |                          |
|--------------------------|---|-------------|---|------------|-------------|--------------------------|
| Alimian 2011             | 0 | 42          | 0 | 42         |             | Not estimable            |
| Apipan 2018              | 0 | 60          | 0 | 20         |             | Not estimable            |
| Auvinen 1987             | 0 | 39          | 0 | 37         |             | Not estimable            |
| Avvisati 1989            | 0 | 6           | 0 | 6          |             | Not estimable            |
| Boylan 1996              | 0 | 25          | 0 | 20         |             | Not estimable            |
| Cansancao 2018           | 0 | 10          | 0 | 10         |             | Not estimable            |
| Choi 2009                | 0 | 32          | 0 | 29         |             | Not estimable            |
| Christabel 2014          | 0 | 25          | 0 | 24         |             | Not estimable            |
| Clave 2019               | 0 | 154         | 0 | 75         |             | Not estimable            |
| Cohen 2021               | 0 | 27          | 0 | 17         |             | Not estimable            |
| Crescenti 2011           | 1 | 100         | 4 | 100        | 0.3%        | 0.25 [0.03, 2.20]        |
| Dadure 2011              | 0 | 19          | 0 | 20         |             | Not estimable            |
| Eldaba 2013              | 0 | 50          | 0 | 50         |             | Not estimable            |
| Fenger-Eriksen 2019      | 0 | 15          | 0 | 15         |             | Not estimable            |
| Goobie 2011              | 0 | 23          | 0 | 20         |             | Not estimable            |
| Kulkarni 2016            | 0 | 120         | 0 | 120        |             | Not estimable            |
| Meng 2019                | 0 | 30          | 0 | 30         |             | Not estimable            |
| Prasad 2018              | 0 | 40          | 0 | 20         |             | Not estimable            |
| Ramezani 2005            | 0 | 32          | 0 | 30         |             | Not estimable            |
| Vel 2015                 | 0 | 50          | 0 | 50         |             | Not estimable            |
| Wu 2006                  | 0 | 108         | 0 | 106        |             | Not estimable            |
| Zaman 2019               | 0 | 88          | 0 | 88         |             | Not estimable            |
| <b>Subtotal (95% CI)</b> |   | <b>1095</b> |   | <b>929</b> | <b>0.3%</b> | <b>0.25 [0.03, 2.20]</b> |
| Total events             | 1 |             | 4 |            |             |                          |

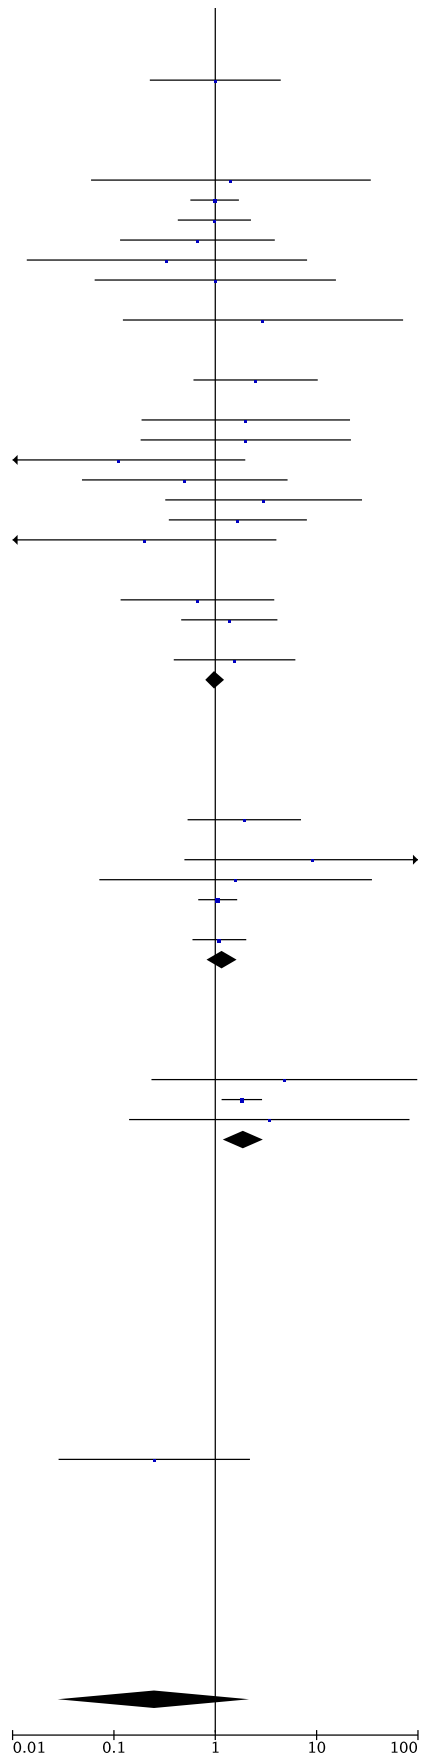

Heterogeneity: Not applicable  
Test for overall effect:  $Z = 1.25$  ( $P = 0.21$ )

**Total (95% CI)**                      **50037**                      **48447**    **100.0%**                      **1.04 [0.92, 1.17]**  
Total events                              532                              454  
Heterogeneity:  $\text{Tau}^2 = 0.00$ ;  $\text{Chi}^2 = 49.90$ ,  $\text{df} = 78$  ( $P = 0.99$ );  $I^2 = 0\%$   
Test for overall effect:  $Z = 0.59$  ( $P = 0.56$ )  
Test for subgroup differences:  $\text{Chi}^2 = 10.33$ ,  $\text{df} = 6$  ( $P = 0.11$ ),  $I^2 = 41.9\%$

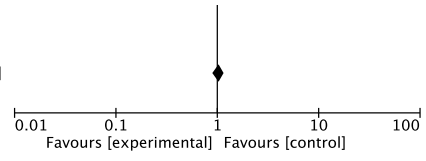

**Figure S12.** Forest plot of the acute coronary syndrome: subgroup analysis by underlying disease.

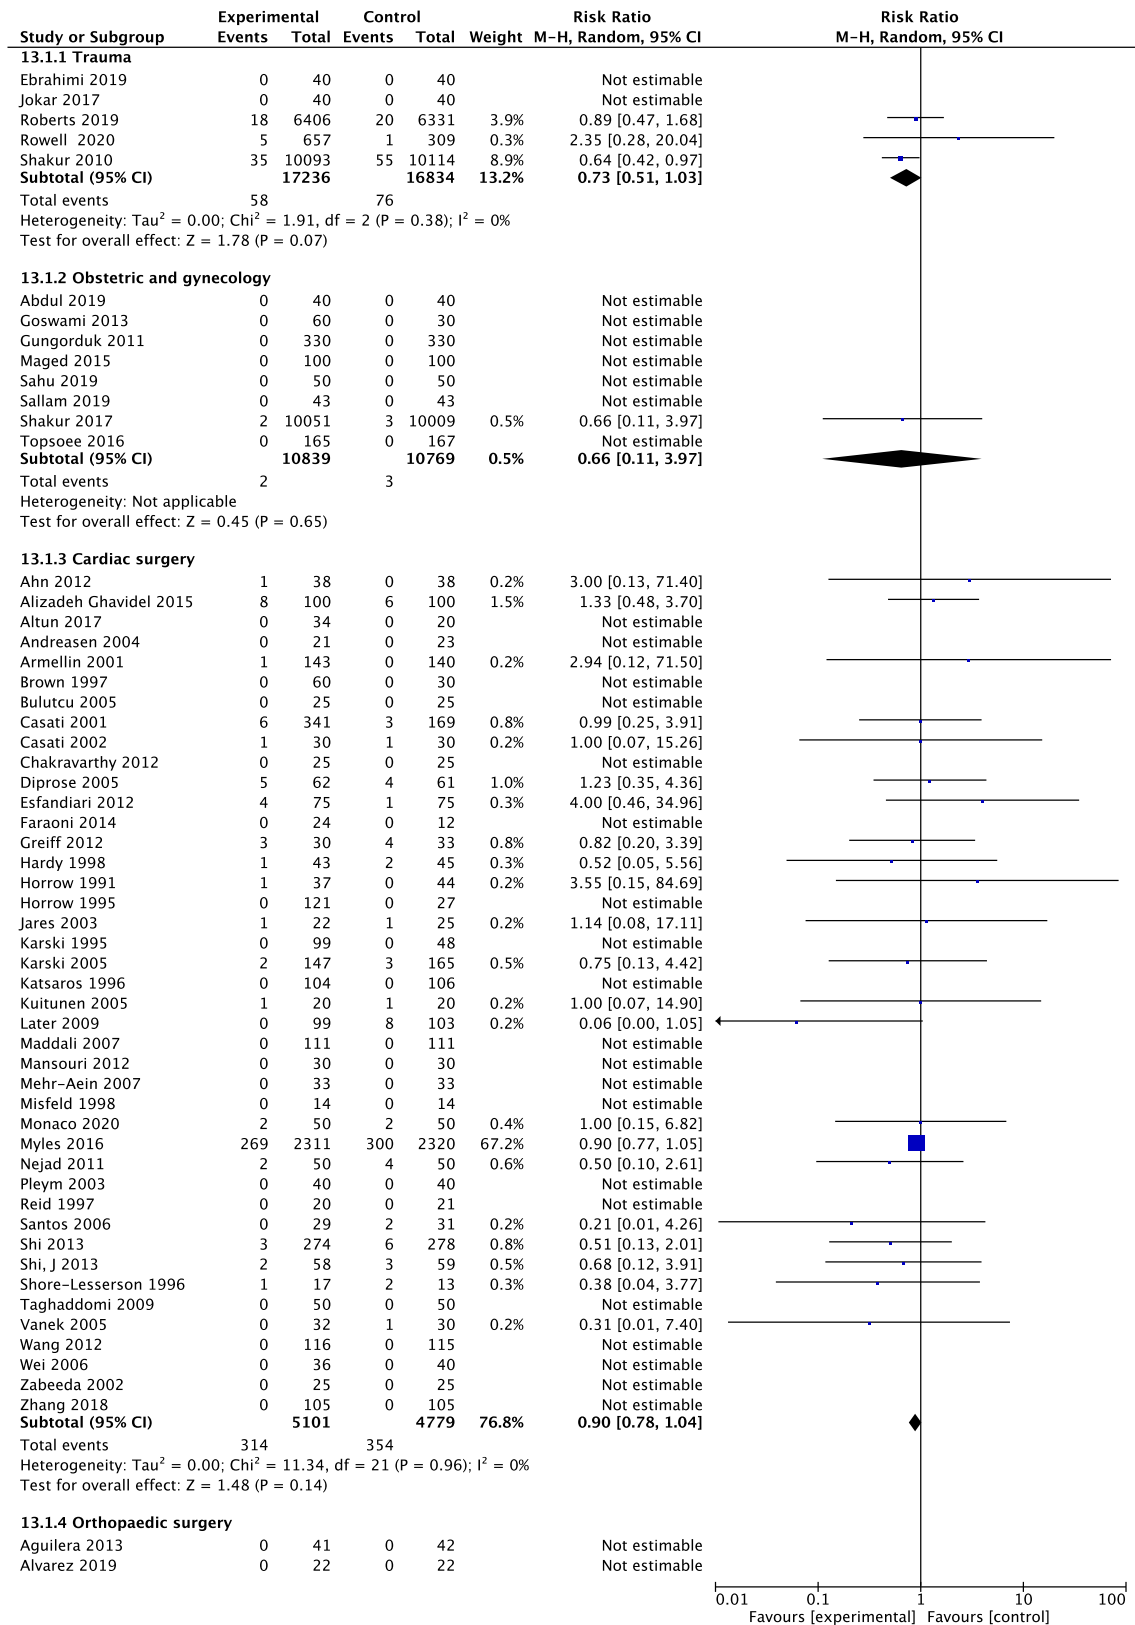

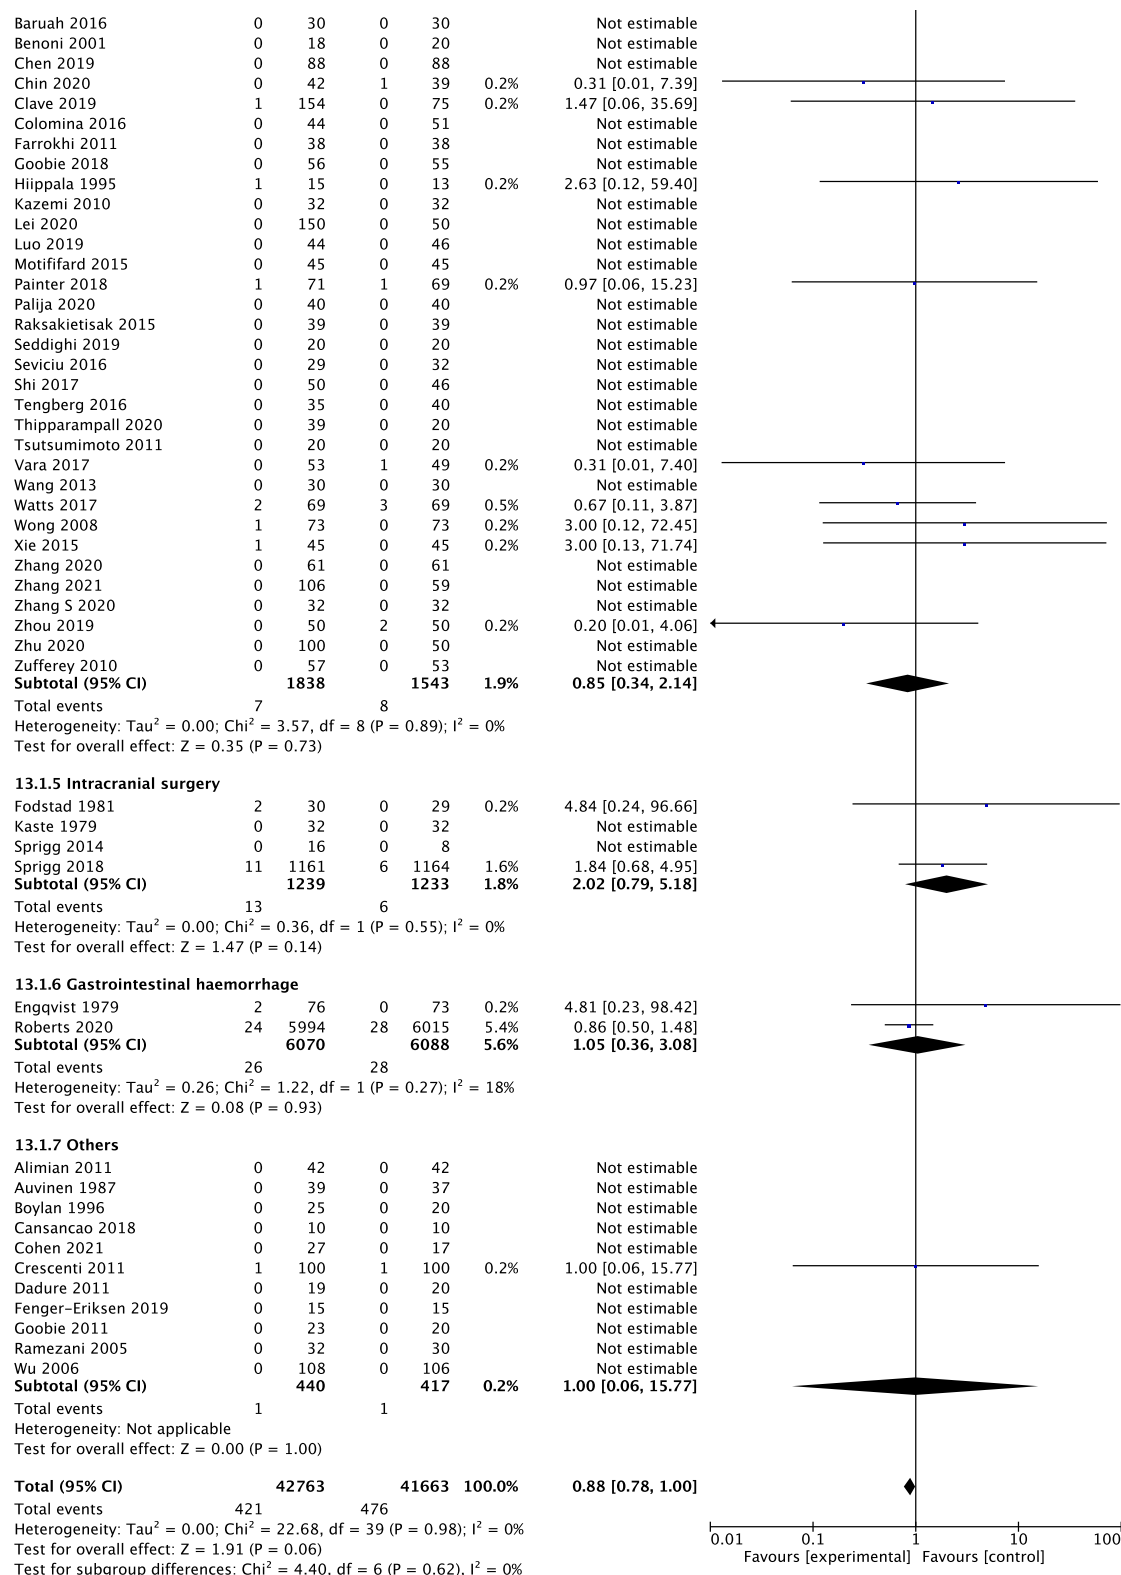

**Figure S13.** Forest plot of the stroke: subgroup analysis by underlying disease.

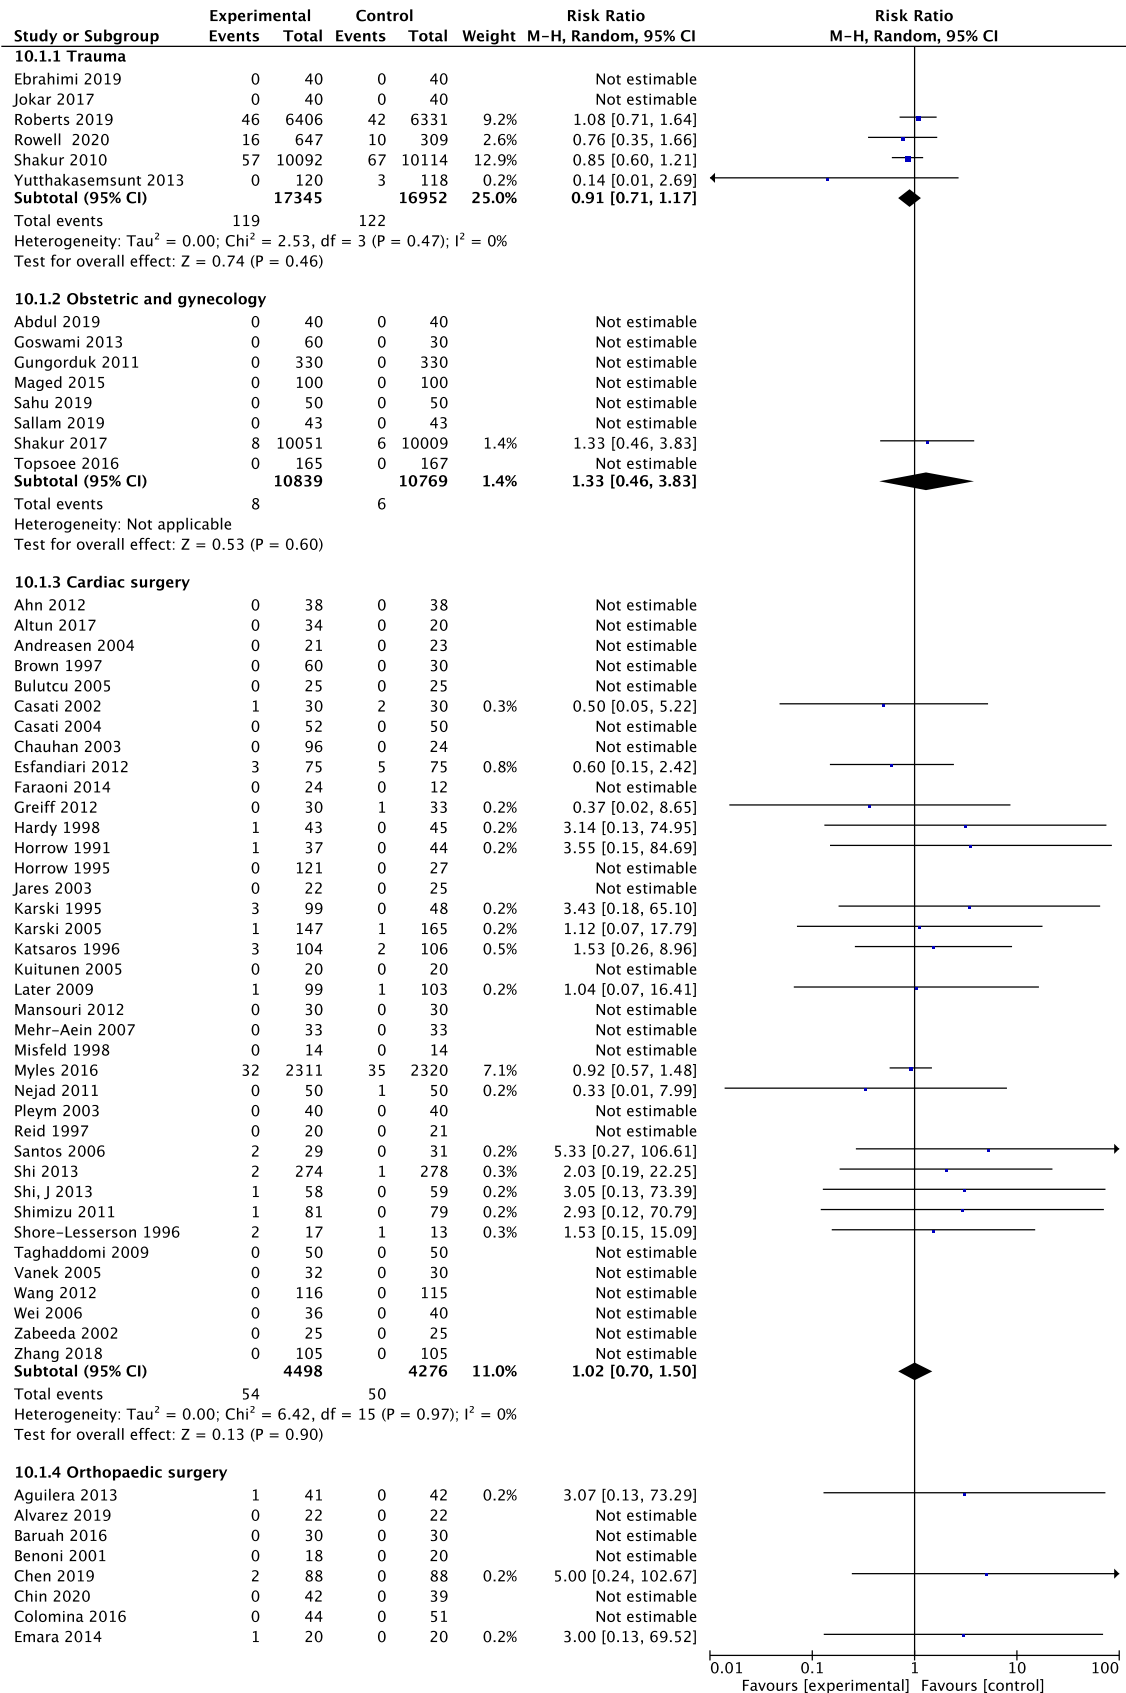

|                          |   |             |   |             |             |                          |
|--------------------------|---|-------------|---|-------------|-------------|--------------------------|
| Chin 2020                | 0 | 42          | 0 | 39          |             | Not estimable            |
| Colomina 2016            | 0 | 44          | 0 | 51          |             | Not estimable            |
| Emara 2014               | 1 | 20          | 0 | 20          | 0.2%        | 3.00 [0.13, 69.52]       |
| Farrokhi 2011            | 0 | 38          | 0 | 38          |             | Not estimable            |
| Goobie 2018              | 0 | 56          | 0 | 55          |             | Not estimable            |
| Hiippala 1995            | 0 | 15          | 0 | 13          |             | Not estimable            |
| Kazemi 2010              | 0 | 32          | 0 | 32          |             | Not estimable            |
| Lei 2020                 | 0 | 150         | 0 | 50          |             | Not estimable            |
| Luo 2019                 | 0 | 44          | 3 | 46          | 0.2%        | 0.15 [0.01, 2.81]        |
| Motifard 2015            | 0 | 45          | 0 | 45          |             | Not estimable            |
| Painter 2018             | 0 | 71          | 1 | 69          | 0.2%        | 0.32 [0.01, 7.82]        |
| Palija 2020              | 0 | 40          | 0 | 40          |             | Not estimable            |
| Raksakietisak 2015       | 0 | 39          | 0 | 39          |             | Not estimable            |
| Seddighi 2019            | 0 | 20          | 0 | 20          |             | Not estimable            |
| Seviciu 2016             | 0 | 29          | 0 | 32          |             | Not estimable            |
| Shi 2017                 | 8 | 50          | 6 | 46          | 1.7%        | 1.23 [0.46, 3.27]        |
| Tengberg 2016            | 0 | 35          | 1 | 40          | 0.2%        | 0.38 [0.02, 9.03]        |
| Thipparampall 2020       | 0 | 39          | 0 | 20          |             | Not estimable            |
| Watts 2017               | 1 | 69          | 0 | 69          | 0.2%        | 3.00 [0.12, 72.39]       |
| Wong 2008                | 0 | 73          | 0 | 73          |             | Not estimable            |
| Xie 2015                 | 0 | 45          | 0 | 45          |             | Not estimable            |
| Zaman 2019               | 0 | 88          | 0 | 88          |             | Not estimable            |
| Zhang 2020               | 0 | 61          | 0 | 61          |             | Not estimable            |
| Zhang 2021               | 0 | 106         | 0 | 59          |             | Not estimable            |
| Zhang S 2020             | 0 | 32          | 0 | 32          |             | Not estimable            |
| Zhu 2020                 | 0 | 100         | 0 | 50          |             | Not estimable            |
| Zufferey 2010            | 3 | 57          | 0 | 53          | 0.2%        | 6.52 [0.34, 123.27]      |
| <b>Subtotal (95% CI)</b> |   | <b>1639</b> |   | <b>1427</b> | <b>3.0%</b> | <b>1.31 [0.63, 2.72]</b> |

Total events 16 11  
Heterogeneity: Tau<sup>2</sup> = 0.00; Chi<sup>2</sup> = 6.15, df = 8 (P = 0.63); I<sup>2</sup> = 0%  
Test for overall effect: Z = 0.73 (P = 0.47)

#### 10.1.5 Intracranial haemorrhage

|                          |    |             |    |             |              |                          |
|--------------------------|----|-------------|----|-------------|--------------|--------------------------|
| Fodstad 1981             | 8  | 30          | 3  | 29          | 1.1%         | 2.58 [0.76, 8.77]        |
| Hillman 2002             | 45 | 254         | 33 | 251         | 9.4%         | 1.35 [0.89, 2.04]        |
| Kaste 1979               | 0  | 32          | 0  | 32          |              | Not estimable            |
| Ross 2000                | 79 | 229         | 84 | 233         | 26.2%        | 0.96 [0.75, 1.23]        |
| Sprigg 2014              | 0  | 16          | 0  | 8           |              | Not estimable            |
| Sprigg 2018              | 16 | 1161        | 11 | 1164        | 2.8%         | 1.46 [0.68, 3.13]        |
| Tsementzis 1990          | 22 | 50          | 11 | 50          | 4.3%         | 2.00 [1.09, 3.68]        |
| Vermeulen 1984           | 59 | 241         | 36 | 238         | 11.5%        | 1.62 [1.11, 2.35]        |
| <b>Subtotal (95% CI)</b> |    | <b>2013</b> |    | <b>2005</b> | <b>55.2%</b> | <b>1.40 [1.05, 1.86]</b> |

Total events 229 178  
Heterogeneity: Tau<sup>2</sup> = 0.06; Chi<sup>2</sup> = 10.38, df = 5 (P = 0.07); I<sup>2</sup> = 52%  
Test for overall effect: Z = 2.29 (P = 0.02)

#### 10.1.6 Gastrointestinal haemorrhage

|                          |    |             |    |             |             |                          |
|--------------------------|----|-------------|----|-------------|-------------|--------------------------|
| Engqvist 1979            | 0  | 76          | 2  | 73          | 0.2%        | 0.19 [0.01, 3.94]        |
| Roberts 2020             | 19 | 5994        | 18 | 6015        | 3.9%        | 1.06 [0.56, 2.02]        |
| <b>Subtotal (95% CI)</b> |    | <b>6070</b> |    | <b>6088</b> | <b>4.0%</b> | <b>0.87 [0.30, 2.54]</b> |

Total events 19 20  
Heterogeneity: Tau<sup>2</sup> = 0.23; Chi<sup>2</sup> = 1.18, df = 1 (P = 0.28); I<sup>2</sup> = 16%  
Test for overall effect: Z = 0.25 (P = 0.80)

#### 10.1.7 Others

|                          |   |            |   |            |             |                          |
|--------------------------|---|------------|---|------------|-------------|--------------------------|
| Alimian 2011             | 0 | 42         | 0 | 42         |             | Not estimable            |
| Auvinen 1987             | 0 | 39         | 0 | 37         |             | Not estimable            |
| Boylan 1996              | 0 | 25         | 0 | 20         |             | Not estimable            |
| Brown 1997               | 0 | 30         | 0 | 30         |             | Not estimable            |
| Cansancao 2018           | 0 | 10         | 0 | 10         |             | Not estimable            |
| Cohen 2021               | 0 | 27         | 0 | 17         |             | Not estimable            |
| Crescenti 2011           | 0 | 100        | 0 | 100        |             | Not estimable            |
| Dadure 2011              | 0 | 19         | 0 | 20         |             | Not estimable            |
| Fenger-Eriksen 2019      | 0 | 15         | 0 | 15         |             | Not estimable            |
| Goobie 2011              | 0 | 23         | 0 | 20         |             | Not estimable            |
| Ramezani 2005            | 0 | 32         | 0 | 30         |             | Not estimable            |
| Wu 2006                  | 0 | 108        | 0 | 106        |             | Not estimable            |
| Zhou 2019                | 1 | 50         | 2 | 50         | 0.3%        | 0.50 [0.05, 5.34]        |
| <b>Subtotal (95% CI)</b> |   | <b>520</b> |   | <b>497</b> | <b>0.3%</b> | <b>0.50 [0.05, 5.34]</b> |

Total events 1 2  
Heterogeneity: Not applicable  
Test for overall effect: Z = 0.57 (P = 0.57)

**Total (95% CI)** 42924 42014 100.0% 1.12 [0.98, 1.27]

Total events 446 389  
Heterogeneity: Tau<sup>2</sup> = 0.00; Chi<sup>2</sup> = 31.75, df = 38 (P = 0.75); I<sup>2</sup> = 0%  
Test for overall effect: Z = 1.71 (P = 0.09)  
Test for subgroup differences: Chi<sup>2</sup> = 5.96, df = 6 (P = 0.43), I<sup>2</sup> = 0%

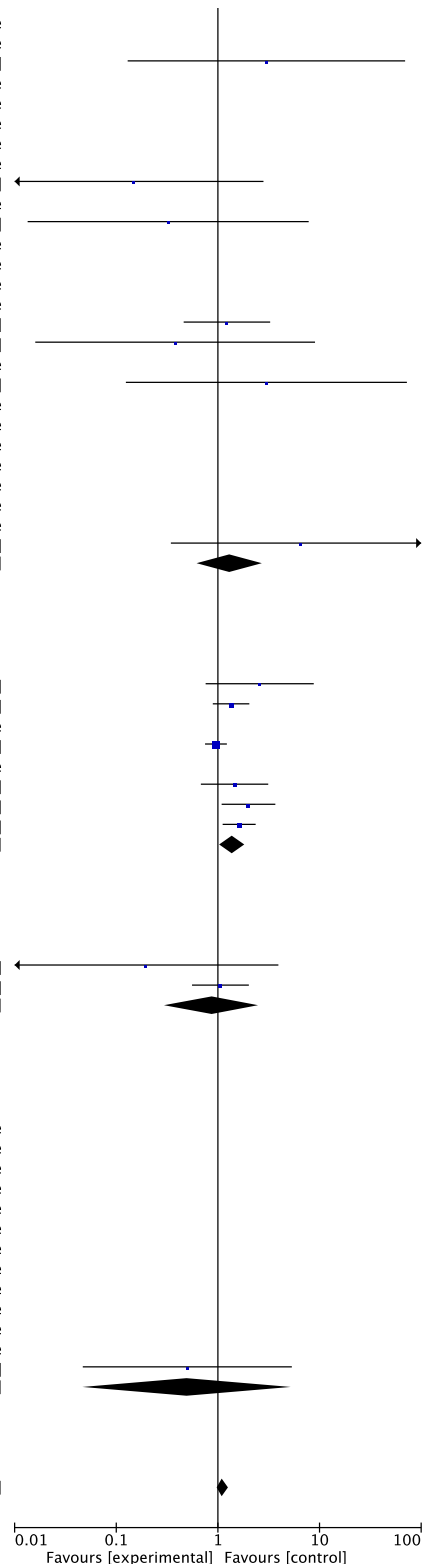

Supplement: MOESM2 [file 19819664]
